# Supplementary material for: Influence of fast ice on future ice shelf melting in the Totten Glacier area, East Antarctica
Source: Copernicus journal article supplement (doi:10.5194/egusphere-2022-94), 2022-04-11
Supplement: Supplementary file [file egusphere-2022-94-AC2-supplement.pdf]

## Response to the Referee #2

Dear Referee,

Thank you for the time that you spent on our manuscript. Below you will find a summary of the changes that we made throughout the manuscript to address all your suggestions.

Yours sincerely

On behalf of all the co-authors,

Guillian Van Achter

## Summary

The Antarctic ice sheet draining into the Southern Ocean via various marine terminating glaciers - aka ice shelves is the major future contributor to global sea level rise. Melting of ice shelves is often highly influenced by the sea-ice conditions at their fronts. This study is investigating the impact of landfast sea ice in front of the Totten and Moscow University ice shelves by using a state-of-the-art coupled numerical ocean-ice model that is regionalized to the wider region of these ice shelves. The investigation focuses on the difference in the ice shelf basal melt rates between recent decades (1995-2014) and the end of the 21st century (2081-2111) - hence investigating the influence of climate warming on the environmental (atmosphere, ocean, sea ice) conditions - with and without a prognostic fast ice coverage. The main outcomes of the study are i) presence of landfast sea ice increases melting rates for both ice shelves under current conditions, ii) climate warming triggers enhanced melting rates at the Totten but not the Moscow University Ice shelves, and iii) without landfast ice the increase in melting rates due to climate warming is larger than with landfast ice.

I rate this as an appropriately well written study of a very interesting aspect. While the presentation of the figures and the material is mostly very clear, I have the impression - independent of what I wrote in my comments further below - that the manuscript would benefit from a careful reading and perhaps restructuring of the content of one or the other paragraph. One example is the one in lines 195-204. However, overall things seems sufficiently clear to me mostly. I have three general comments and only few specific and editorial comments.

## General comments

GC1: The paper would benefit from an improved description of the physical processes that the authors expect to resolve with their study. While most of these come at a certain point in the description of the results and/or in the discussion, the readability of the paper as a whole would be greatly enhanced if the authors could come up with research hypotheses ... perhaps along the lines:

Climate warming leads to a reduction of the sea ice cover in the Southern Ocean and hence most likely to a reduction in the stability and duration of the landfast ice cover.

A reduction in landfast sea ice changes the atmosphere-ocean energy fluxes and can impact near-surface ocean currents and the vertical water mass structure.

We thank the referee for the suggestion. We improved the research hypotheses paragraph in the introduction with the proposed sentences (see page 3, lines 58-68).

GC2: There is more in the data than the authors show and discuss. This begins with the differences in the standard deviations shown in Table 2 (why?), continues with little discussion of the temporal variability inherent in the time series of the melt rates (— > What happens in years 6 and 7?), and ends when it comes to incorporating observational datasets to enhance the credibility of some of the statements made - be it with respect to the design of the experiment (keyword ice bergs) or with respect to how realistic is the fast ice cover modeled / where are main ice production sites located. As suggested we added more analysis on the changes in std (see page 12, lines 219-223, Fig. A4). The melt rate decrease of the sixth and seventh years is intrinsic to the ocean boundary conditions (see page 12, lines 223-224). The validation of the REF simulation against observation (fast ice, sea ice production, polynya locations, ..) has already been done in the Van Achter et al. (2022) paper, and we think that it would be redundant to do it again in this manuscript. Furthermore, the focus of this study is more on the comparison between REF and WARM. We adapted the manuscript to emphasise this point in the experimental design (see page 5, lines 120-122).

GC3: Some of the points discussed would benefit from more illustrative figures - such as results obtained with nFST and nFST\_WARM in the context of the winter sea ice concentration (and polynya location) or the near-surface ocean currents. As suggested in some of the specific comments, we have added figures in the updated version of the manuscript (sea ice production, spatial distribution of the melt rate, ocean velocities for nFST,...)

## Specific comments

L25-31: In these lines you refer to the effect of fast ice. While you partly differentiate between multiyear fast ice (L25) and seasonal fast ice (L30) it remains unclear whether there is difference in the impact of these two kinds. Would it make sense to be more clear here? The impact of fast ice that we have studied in our previous paper did not separate the effect of the multiyear fast ice from the seasonal fast ice. The multiyear fast ice, being located along the coast and being thicker, has an important role as insulator during the Summer, but both yearly and multiyear fast ice are important during Winter, by decreasing the sea ice production and enhancing the ocean stratification near the coast. We adapted the manuscript, see page 2, lines 30-35.

In addition I am wondering whether it would make sense at this stage, to provide more details about the physical processes by which fast ice protects an ice shelf and/or changes water mass modification such that it has a notable impact on the development of the ice shelf. Describing these processes upfront would also help to understand whether and how the fast ice in the model leads to changes in the ice shelf; are the processes the same? How does a fast ice cover change the water mass properties? How does a fast ice cover protect the ice shelf boundary? As suggested, we added more details in the manuscript on how the fast ice changes the ocean stratification and how the fast ice protects the ice shelf front (see page 2, lines 27-36 and also in page 16, lines 240-244).

It seems that calving of ice bergs at the ice shelf boundary supported by the action of ocean swell is not among the processes you are taking into account. Is that correct? You could mention this here. Indeed we do not take that into account as there are no iceberg calving in the model.

L51: I guess "Those models" refers to the models referred to in L48. Still, in order to estimate the importance (or size of the knowledge gap here) of not including fast ice it might be a good idea to mention about how many models we are talking here. None of the studies mentioned in L48 has a fast ice representation (prescribed or prognostic).

To our knowledge, only a few models have a prescribed fast ice in the Antarctic, and only two have a prognostic fast ice representation (Huot et al. (2021) and us.)

L102: Remaining questions I have with respect to the model:

- Does the model allow the water to have sub-freezing temperatures (see e.g. Haumann et al. 2020)? No, it does not.

- How does the model "grow" fast ice? The fast ice formation comes firstly through the advection of sea ice which forms ice arches between icebergs and between icebergs and the coast. Once the sea ice is trapped by these ice arches, it thickens by snow accumulation and by more sea ice advection from the East. We added more information on how our model grow fast ice in the introduction (see page 2, lines 27-36).

- How does the model treat ice shelf calving and generation of ice bergs? There are no iceberg calving in the model. Which is why we don't describe this process in our introduction. The icebergs are prescribed and are static during all the simulation

- How does the model treat marine ice / platelet ice accretion underneath the ice shelf / the fast ice? The model is only ocean-sea ice coupled. So the ice shelf thickness is prescribed and stays the same throughout the simulation. There are no platelet ice accretion underneath the ice shelf, the ice melt/grow follows the ice shelf module implemented by Mathiot et al. (2017) (temperature and velocity dependent). The fast ice is treated as sea ice in the model.

Figure 4: In the caption you (correctly) write "sea ice concentration" whereas in the title of the panels your write "sea ice extent". This should be harmonized towards "sea ice concentration" or "sea ice area fraction". Done.

Figure 5: In order to avoid readers trying to find the eastward transport associated with the ACC in panels a) and b) it might make sense to annotate more latitudes. Agreed, done.

Please remind the reader your motivation to choose a transect (in panel d) that is at the far eastern boundary of your region of interest and therefore quite far away from both the gyre on the shelf and the TIS. There was an error in the manuscript, the ocean transport is averaged over the all configuration.

L184: "more variable (+55%)" -- > It is not clear to what you are referring to here? To the increase in the standard deviation? It is now specified in the manuscript that is was related to the standard deviation.

Figure 7, panel a): What happened in years 6 and 7 in TIS? Why are melt rates so similar? The basal melt rate decrease in years 6 and 7 is inherent to the ocean boundary conditions that drive a sudden temperature drop (It is now described in the manuscript in page 12, lines 223-224).

L198: "the presence of fast ice induces less sea ice production and more sea ice melt" -- > I am not sure this global statement holds. I would think that it requires to take into account whether you are dealing with seasonal or multiyear fast ice, how far away the ice production sites are from the ice shelf boundaries and how efficient these are in the context of the production of the fast ice itself. It might be very illustrative to show two panels of the kind shown in Figure 4 e) and f) which back up your notion about the change in location of polynyas (and hence areas of high ice production). We added a figure of the differences in mean sea ice production between WARM and REF to back up our statement (pages 9-10, lines 166-170, Fig. 5).

L199: The causal link between enhanced upper ocean stratification and enhanced warm water intrusion should be made more clear. It is not immediately understandable. Perhaps it might make sense to show maps of the kind

shown in Fig. 5 a), b) that illustrate the ocean currents. One of your earlier arguments was that a loss of fast ice between REF and WARM is responsible for the intensification of the Totten shelf gyre. I am wondering how this gyre looks like in nFST and nFST\_WARM. From Figure 5 it is clear that during WARM there is substantially more water transport towards the TIS than during REF. [As suggested before, we have detailed the introduction section about fast ice, describing the link between the changes in ocean stratification and the intrusion of warm water into the cavities. Furthermore, we added the figure A2, which shows the gyre for REF and nFST.](#)

Table 2: What explains the switch from a lower standard deviation for 1995-2014 for the nFST cases compared to the higher standard deviation for 2081-2100 for the same cases? [The higher melt rate std is explained partly by a higher mixed layer depth variability in WARM compared to REF, which should be related to the larger amplitude of the seasonal cycle of the surface air temperature \(see page 12, lines 219-223\).](#)

L229/230: This might be in part triggered by the intensification of the Totten Shelf gyre, right? It might therefore make sense to come up with a number for the increase in water mass transport (in Sv) near the northeastern edge of the TIS between REF and WARM (see Fig. 5 a, b). [Part of the higher melt rate in TIS compared to MUIS is indeed due to the coastal current acceleration in front of the TIS cavity. The increase of the integrated ocean transport in front of the TIS cavity is 226%. We added this results in the manuscript \(see page 10, lines 175-180\).](#)

L254-256: "we were forced ... simulations" — > I am not on your page with this statement. There is at least one data set of ice berg distribution around Antarctica that covers more than just two months in a particular year. In addition, I'd say - if you are in doubt whether this limited data set suffices - you could at least compare your modeled fast ice extents in REF with fast ice derived from either MODIS or AMSR-E/2 satellite remote sensing observations. Should - within your period of interest - substantial differences occur in the location and stability of these ice bergs then I would assume that you would discover an increasing discrepancy between your model results and the observations. I would say this is simply about getting the correct data set to look at. Alex Fraser would be one point of contact; Nihashi Oshima another one. [In Van Achter et al. \(2022\), we compare our simulated fast ice with observed fast ice \(given by Alex Fraser\) over the 2001-2010 period, and the differences between simulated and observed fast ice are acceptable. The icebergs dataset was given by Rick Smith. This dataset had the advantage of being at a high resolution \(less than 1km\). Since the fast ice in the Totten area has a low interannual variability, we estimated that the short period covered by the icebergs dataset was enough. The goal of the L254-256 sentence is to point the difficulty to predict the icebergs distribution by the end of the 21st century and how a drastic change in iceberg distribution could strongly alter the results of the study.](#)

## Typos / editorial remarks

L41: "will" — > Is this a definite change or is this rather something that could happen? Please re-phrase in case. [Done.](#)

L113: Please clarify whether Fig. 2b shows salinity profiles before or after bias correction. [Done.](#)

L138: "winds anomaly" — > "wind anomalies" to match with "occur". [Done.](#)

L146: Would it make sense to note that this first-year fast ice is at a different location? [Yes, the first-year fast ice is at a different location in WARM compared to REF. We think that this is already explained by the sentence "the multiyear fast ice cover \(frequency above 0.9\) in REF is replaced by first year fast ice in WARM".](#)

L154: If we both look at the same gyre (there is only one) then this is the southern limb of the gyre that is amplified - as is even visible in the zonal transport at 66.6 deg S. [Done](#).

L158: "eastern" -- > "eastward". [Done](#).

L168: "mostly function" -- > "mostly a function". [Done](#).

L169: "This" -- > "These". [Done](#).

L185: You could add that the variability even decreases. [Done](#).

L200: "disappears" -- > I tend to say it shrinks but it does not disappear - at least not according to Figure 4. [Agreed, done](#).

L218: "to broader" -- > "to a broader". [Done](#).

L226: "and a fast ice representation" -- > I suggest to stress here one more time how accurate the this fast ice representation is compared to observations ... how accurate is it? [Since the comparison between simulated and observed fast ice is more the subject of the Van Achter et al. \(2022\) paper and is already detailed in this paper, we prefer not to add such information in the conclusion.](#)

L231: And because there is no speed up of any currents nearby? [Agreed, done](#).

L241: "are similar by the end of the 21st century" -- > This is valid for TIS but not for MUIS which shows a melt rate for nFST\_WARM that is about 10% larger than for WARM. Especially if we see this in relation to the melt rates for TIS between REF and nFST which also differ by an order of 10%. I therefore suggest to rephrase this statement. [Agreed, done](#).

# Influence of fast ice on future ice shelf melting in the Totten Glacier area, East Antarctica

Guillian Van Achter<sup>1</sup>, Thierry Fichefet<sup>1</sup>, Hugues Goosse<sup>1</sup>, and Eduardo Moreno-Chamorro<sup>2</sup>

<sup>1</sup>Earth and Life Institute, Georges Lemaitre Centre for Earth and Climate Research, UCLouvain, Louvain-la-Neuve, Belgium.

<sup>2</sup>Barcelona Supercomputing Center (BSC), Barcelona, 08034, Spain.

**Correspondence:** Guillian Van Achter (guillian.vanachter@uclouvain.be)

**Abstract.** The Totten Glacier in East Antarctica is of major climatic interest because of the large fluctuations of its grounding line and potential vulnerability to climate change. Here, we use a series of high-resolution, regional NEMO-LIM-based experiments, which include an explicit treatment of ocean–ice shelf interactions as well as a representation of grounded icebergs and fast ice, to investigate the changes in ocean–ice interactions in the Totten Glacier area between the last decades (1995-2014) and the end of the 21st century (2081-2100) under SSP4-4.5 climate change conditions. By the end of the 21st century, the wide areas of multiyear fast ice simulated in the recent past are replaced by small patches of first year fast ice along the coast, which decreases the total summer sea ice extent. The Antarctic Slope Current is accelerated by more than ~~90~~116% and the Totten ice shelf melt rate is increased by ~~44~~91% due to enhanced warm water intrusions into its cavity. The representation of fast ice dampens the ice shelf melt rate increase throughout the 21st century, as the Totten ice shelf melt rate increase reaches ~~58~~136% when fast ice is not taken into account. The Moscow University ice shelf melt rate increase is even more impacted by the representation of fast ice, with a ~~4~~36% melt rate increase with fast ice, compared to a ~~38~~75% increase without a fast ice representation. Fast ice enhances the ice shelves basal melt rate for the last decades but holds a limited effect by the end of the 21st century due to the strong sea ice loss. This highlights the importance of including representation of fast ice to simulate realistic ice shelf melt rate increase in East Antarctica under warming conditions.

## 1 Introduction

The Totten Glacier area, located on the Sabrina Coast in East Antarctica, underwent significant grounding-line fluctuations during the recent past. Driven by changes in the ocean (Aitken et al., 2016), these fluctuations are making the region potentially vulnerable to rapid ice sheet collapse (Roberts et al., 2011). There has been some indication of ice shelf thinning during the last decade (Khazendar et al., 2013), although it remains unclear whether this represents a long-term trend (Paolo et al., 2015). Furthermore, the Totten catchment, located in the Aurora Subglacial Basin of East Antarctica, contains 3.5-m sea level rise equivalent and is one of the few sectors of East Antarctica where changes in ice dynamics have been observed recently (Greenbaum et al., 2015). Understanding how changes in the ocean–ice interactions are interfering with the basal melt of the Antarctic ice shelves and how they will evolve in the future is crucial for projections of future sea level rise.

A key element of the ocean–ice interactions in the Totten Glacier area is the fast ice (Van Achter et al., 2022), defined as stationary sea ice which forms and remains attached to the shore or between grounded icebergs (WMO, 1970; Massom et al., 2001; Fraser et al., 2012). Numerous observations show the presence of ~~multiyear~~ both multiyear and seasonal fast ice in front of both the Totten and Moscow University ice shelves (Fraser et al., 2012, 2020). Van Achter et al. (2022) have clearly demonstrated with a numerical model (over the years 2001–2010) that the presence of fast ice in the Totten Glacier region impacts ~~both the location of coastal polynyas and the ocean mixed layer depth~~ the all ice–ocean system. Fast ice grows through the advection of sea ice which forms ice arches between icebergs or between icebergs and the coast. Once the sea ice is trapped by the ice arches, it thickens by snow accumulation. Once established, a thick multiyear fast ice pack along the coast, in addition to favouring the thermodynamically isolates the ocean from the atmosphere during the Summer. In the Winter, both yearly and multiyear fast ice relocate the coastal polynyas off shore, which decreases the sea ice production close to the coast. These effects combined increase the ocean stratification in front of the cavities and it favours the intrusion of modified Circumpolar Deep Water (mCDW) into the ice shelf cavities, with an enhanced or reduced ice shelf melting depending on the location. ~~The Fast ice can also have a dynamical influence on the ice shelf, as the~~ loss of buttressing from the break-up of seasonal fast ice increases the seasonality of the Totten ice shelf (TIS) basal melt rate close to the ice front (Greene et al., 2018).

Large density, temperature, salinity and sea level gradients are found across the Antarctic Slope Front (ASF; Whitworth et al., 1985; Jacobs, 1991), which separates the continental shelf from the open Southern Ocean. A strong pressure gradient is observed across the ASF, mainly caused by the strong easterly winds that drive a sea surface height gradient via Ekman drift (Mathiot et al., 2011), as well as a density gradient, which results from the differences in temperature and salinity of the water masses across the ASF. Additionally, the ASF manifests itself through strong isopycnal doming towards the continental shelf. These lateral gradients across the ASF contribute to establishing the geostrophically balanced, vertically sheared along-slope flows of the Antarctic Slope Current (ASC; Jacobs, 1991; Thompson et al., 2018). The ocean dynamics associated with the ASF and ASC govern along- and across-slope heat transport (Stewart et al., 2018), and act as a barrier to mixing between shelf and open-ocean waters (Thompson et al., 2018). Shifts in position of the ASF, or changes in the range of densities of waters that occupy the continental shelf, ~~will~~ therefore strongly influence the heat budget of the continental shelf (Thompson et al., 2018). Moorman et al. (2020) suggested that increasing glacial meltwater fluxes strengthens the lateral density gradient associated with the ASF, which reduces cross-slope water exchanges and isolates shelf waters from warm mCDW. Naughten et al. (2018) also found an intensified density gradient across the continental slope which reinforces the Antarctic Coastal Current. In the Totten Glacier region, the ASC modulates the heat intrusion towards the Totten Glacier (Nakayama et al., 2021).

As a consequence, understanding how the ASC will evolve in this region under future climate conditions is key to gain insights on changes in heat intrusion across the continental shelf break. The future changes in ice shelf melt rate under different Representative Concentration Pathway (RCP) scenarios have been studied with both global and regional models (Hellmer et al., 2012; Timmermann and Goeller, 2017). In the Totten Glacier area, Pelle et al. (2021) found that, by the end of the 21st century, the ASC might weaken by 37% compared to its present-day state and the Totten ice shelf melt rate might increase by 56%

following a high emission scenario. Those models include representations of ocean–ice shelf interactions, but none of them has an prognostic representation of the fast ice.

60 The present study follows on from Van Achter et al. (2022), which presented a prognostic fast ice representation and investigated the impact of fast ice on ocean–ice interactions over the last decade. The goal of the present study is twofold. ~~Firstly, we want to~~ As climate warming leads to a reduction of the sea ice cover in the Southern Ocean and hence most likely to a reduction in the stability and duration of the fast ice cover, we first evaluate how the ocean–ice shelf interactions in the Totten Glacier region will change in a warming climate, with a particular focus on the ASC changes and their origin. Secondly, as a reduction in fast ice changes the atmosphere-ocean energy fluxes and impacts both the near-surface ocean currents and the ocean stratification, we aim at assessing how an explicit fast ice representation included in a model affects the simulation of the ice shelf melt rate evolution between the last decades and the end of the 21st century. In order to answer these questions, we designed ~~four-six~~ simulations with a high-resolution, regional configuration of the NEMO3.6-LIM3 model, ~~two-four~~ of them being forced with anomalies derived from a simulation with the global climate model EC-Earth3 driven by the SSP4-4.5 scenario (Shared Socioeconomic Pathways; Döscher et al., 2021).

This manuscript is organised as follows. The model, regional configuration and experimental design are described in Section 2. In Section 3, we analyse the changes in sea ice and ocean characteristics and ice shelf melt rate between the last decades and the end of the 21st century simulated by the model. The sensitivity of the ice shelf melt rate to the representation of fast ice is then addressed in Section 4. Conclusions are finally given in Section 5.

## 75 2 The model, forcing and experimental design

### 2.1 Ocean–sea ice model

We make use of NEMO 3.6 (Nucleus for European Modelling of the Ocean; Madec, 2008) that includes the ocean model OPA (océan parallélisé) coupled with the Louvain-la-Neuve sea ice model (LIM3; Vancoppenolle et al., 2009; Rousset et al., 2015). This combination is hereafter referred to as NEMO-LIM. OPA is a state-of-the-art, finite-difference ocean model based on primitive equations. Our setting includes a polynomial approximation of the seawater equation of state (TEOS-10, IOC, 2010) optimized for a Boussinesq fluid (Roquet et al., 2014). Vertical turbulent mixing is rendered through a Turbulent Kinetic Energy (TKE) scheme (Bougeault and Lacarrere, 1989; Gaspar et al., 1990; Madec et al., 1998). The enhanced vertical diffusion mixing coefficient utilised in this scheme is fixed to  $20 \text{ m}^2/\text{s}$ . LIM3 uses a five-category subgrid-scale distribution of sea ice thickness (Bitz et al., 2001). The drag coefficient is set to  $7.1 \times 10^{-3}$  at the sea ice–ocean interface and  $2 \times 10^{-3}$  at the sea ice–atmosphere one (Massonnet et al., 2014). Ice shelf cavities with explicit ocean–ice shelf interactions are represented by the ice shelf module implemented in NEMO by Mathiot et al. (2017), using the three-equation formulation from Jenkins (1991). Transfer coefficients for heat ( $\gamma_T$ ) and salt ( $\gamma_S$ ) between the ocean and ice shelves are velocity dependent (Dansereau et al., 2014):  $\gamma_{T,S} = \Gamma_{T,S} \times u_*$ . The friction velocity is given by  $u_* = C_d \times \sqrt{u_{TML}^2}$  and constant values of  $\Gamma_T$  and  $\Gamma_S$  taken from Jourdain et al. (2017) are employed ( $\Gamma_T = 2.21 \times 10^{-2}$  and  $\Gamma_S = 6.19 \times 10^{-4}$  for temperature and salinity, respectively).  $C_d$  is the top drag coefficient, set to  ~~$14 \times 10^{-3}$~~   $3 \times 10^{-3}$ , and  $u_{TML}$  is the ocean velocity in the top mixed layer, which is either



the top 30 m of the water column or the top model layer (if thicker than 30 m) (Losch, 2008).

## 2.2 The Totten24 model configuration

Here, we use a regional configuration of NEMO-LIM, referred to as Totten24, which is described in detail in Van Achter et al. (2022). The horizontal grid is a  $1/24^\circ$  refinement (less than 2 km grid spacing) of the eORCA1 tripolar grid, centered on the continental shelf in front of the TIS, East Antarctica, and covering an area between  $108-129^\circ$  E and  $63-68^\circ$  S (Fig. 1). The NEMO and LIM time steps are 150 s and 900 s, respectively. The vertical discretisation has 75 levels, with level thickness increasing with depth and partial cells used for better representing bedrock and ice shelf bases (Adcroft et al., 1997). The ocean layer directly underneath the ice shelf base varies between 30 m near the cavity front and 80 m in the center of the cavity. The bathymetry and ice shelf draft datasets are derived from the NASA Making Earth System Data Records for Use in Research Environments (MEaSUREs) program, which contains a bathymetry map of Antarctica based on mass conservation, streamline diffusion and other methods (Morlighem et al., 2020).

The ocean lateral boundary conditions and initial conditions are taken from a 1979-2014 simulation with an eORCA025 ( $1/4^\circ$ , 75 levels) peri-Antarctic NEMO-LIM configuration (Pelletier et al., 2022) (hereafter referred to as PARASO). Because of a negative salinity bias in the PARASO simulation, a salinity correction of 0.25 g/kg is uniformly added to the ocean lateral boundary conditions and initial conditions. At the lateral boundaries, a flow relaxation scheme (Engedahl, 1995) is applied to the three-dimensional ocean variables and two-dimensional sea ice variables. A Flather scheme (Flather, 1994) is used for barotropic velocities and sea surface elevation. Furthermore, the sea surface elevation and barotropic velocities from the FES2014 tide model (Carrère et al., 2012) are added to the boundary for the tide components K1, K2, M2, P1, O1, S2, 2N2, Mm, M4, Mf, Mtm, MU2, N2, NU2, Q1, S1, L2, T2, as in Maraldi et al. (2013); Jourdain et al. (2019); Huot et al. (2021). The surface fluxes of heat, freshwater and momentum are computed using the CORE bulk formulas (Large and Yeager, 2004), with atmosphere input coming from the fifth generation ECMWF atmospheric reanalysis (ERA5, Hersbach et al., 2020). No surface salinity restoring is applied.

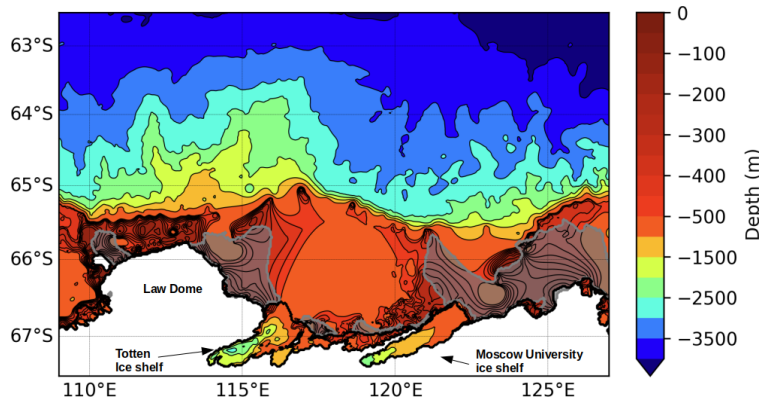

**Figure 1.** Model bathymetry and domain. The contour interval is 50 m up to 500 m depth and 500 m up to 4500 m depth. Ice shelf cavities are surrounded by a thick black line. The 0.75 fast ice observed frequency from Fraser et al. (2020) is shown by the shaded gray areas.

### 2.3 Experimental design

Our experimental design consists of one reference simulation and a set of ~~three~~ five sensitivity experiments. All simulations include the tide constituents and the ocean–ice shelf interactions (i.e., open ice shelf cavities and interactive basal melt computation). The reference simulation (REF) includes a representation of grounded icebergs and a sea ice tensile strength parameterisation. Both are needed to simulate adequately the fast ice formation (Van Achter et al., 2022). The grounded iceberg dataset used is extracted from the remote sensed mosaic ‘RAMP AMM-1 SAR Image Mosaic of Antarctica, Version2’ (Jezek et al., 2013) and covers the September-October months of 1997. The grounded icebergs are prescribed in the model by setting the bathymetry value to zero at every iceberg location (~~see Van Achter et al. (2022))~~ (Van Achter et al., 2022). The sea ice tensile strength parameterisation was developed by Lemieux et al. (2016). The REF simulation covers the 1995 to 2014 period, with a ~~1993-1994~~ 20 years spin-up. A similar simulation was conducted by Van Achter et al. (2022) and evaluated against observations (sea ice concentration, fast ice, sea ice production, sea ice thickness, polynya locations and temperature and salinity profiles). For the present study, the salinity bias identified in ~~this study~~ Van Achter et al. (2022) has been corrected (Fig. 2b), without altering the vertical profiles of temperature (Fig. 2a), ~~and the~~. Moreover, due to a miscalculation in Van Achter et al. (2022) in the computation of the temporal basal melt rate, the top drag coefficient in the ice shelf cavities has been ~~increased~~ decreased from  $8 \times 10^{-3}$  to  ~~$14 \times 10^{-3}$  to reduce the ice shelf melt rate bias~~  $3 \times 10^{-3}$ . With these modifications, the simulated TIS melt rate (~~9.06-11.13~~ 10.47 m/yr) is in better agreement with Rignot et al. (2013)’s estimate ( $10.47 \pm 0.7$  m/yr). ~~This is also the case for the Moseow University ice shelf (MUIS), with a simulated melt rate of 5.95 m/yr, which is closer to the  $4.7 \pm 0.8$  m/yr estimate of Rignot et al. (2013).~~ Except for those changes in ice shelf melt rate and salinity profiles, results from this new REF simulation are very similar to those of the previous one in terms of sea ice distribution and ocean circulation.

The sensitivity experiments include the nFST, WARM and nFST\_WARM simulations (Table 1). nFST is identical to REF but without fast ice representation i.e., no tensile strength parameterisation and no grounded icebergs representation. WARM and nFST\_WARM have the same setup as REF and nFST, respectively, but cover the 2081-2100 period. In these simulations,

the model is forced by climate anomalies derived from a climate change projection carried out with the global climate model EC-Earth3 under the SSP4-4.5 scenario (Döscher et al., 2021), within the 6th phase of the Coupled Model Intercomparison Project (Eyring et al., 2016). Note that, in WARM, the grounded icebergs location are the same as in REF, and that, as for REF and nFST, WARM and nFST\_WARM have a 20 years spin-up. Two more sensitivity experiments have been conducted to disentangle the effect of both the atmospheric and oceanic forcing on the ASC acceleration. WARM\_noAtm is similar to WARM, except that this simulation has no EC-Earth3 anomaly applied over the atmosphere. WARM\_noOce is equivalent to WARM but without the EC-Earth3 anomaly applied over the ocean velocity.

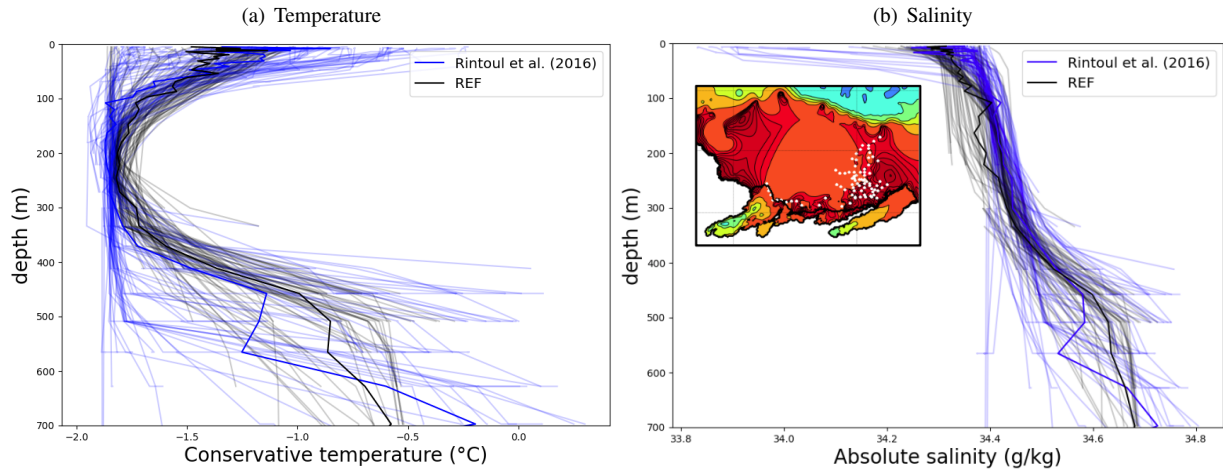

**Figure 2.** Vertical profiles of temperature (a) and salinity (b) after the bias correction on the continental shelf in front of the Totten ice shelf. Blue: CTD from Rintoul et al. (2016) (a1402). RedBlack: as simulated in REF. Simulated profiles are taken at the same time and location as the CTD measurements. The observations have been collected in two locations, close to the TIS front and near the Dalton coastal polynya. The locations are denoted by white dots in the panel displayed in subfigure b.

Annual cycles of the EC-Earth3 climate anomalies are computed as the differences between 2081-2100 and 1995-2014, and are added to all the fields of the atmospheric and oceanic forcings used for the 1995-2014 period in REF and nFST (for the atmosphere: wind velocity, temperature, specific humidity, surface downward radiation and precipitation; for the ocean: current velocity, temperature, salinity, sea surface height, sea ice concentration, sea ice thickness and snow thickness). Figure 3 shows the annual mean ocean temperature, salinity and zonal ocean velocity anomalies at the eastern boundary condition, and the mean near-surface (2 m) air temperature and atmospheric zonal wind (10 m) velocity anomalies. We show the ocean anomalies at the eastern lateral boundary condition as they are very similar to those at the western lateral boundary condition, and also because the ocean eastern boundary condition is one of the drivers of the ocean dynamic over the continental shelf in regional modelling (Nakayama et al., 2021). The ocean temperature anomaly is positive everywhere, with values from 0 to 0.5° C over the continental shelf and in the deep ocean, and from 1 to 1.5° C in the upper ocean outside of the shelf. The seawater salinity anomaly is mostly negative (down to -0.4 g/kg), with the lower values above the continental shelf. Oceanic zonal velocity anomalies at the eastern boundary are westward over the shelf and eastward off the shelf. The EC-Earth3 anomaly applied at

155 the zonal wind component is mostly eastward over the ocean, increasingly towards the north. Westward ~~winds-anomaly~~ wind anomalies also occur, but only over a small part of the shelf and over the continent. The surface air temperature anomaly is positive everywhere (Fig 3e), with values larger than  $1^{\circ}\text{C}$  and up to  $1.8^{\circ}\text{C}$  near the coast.

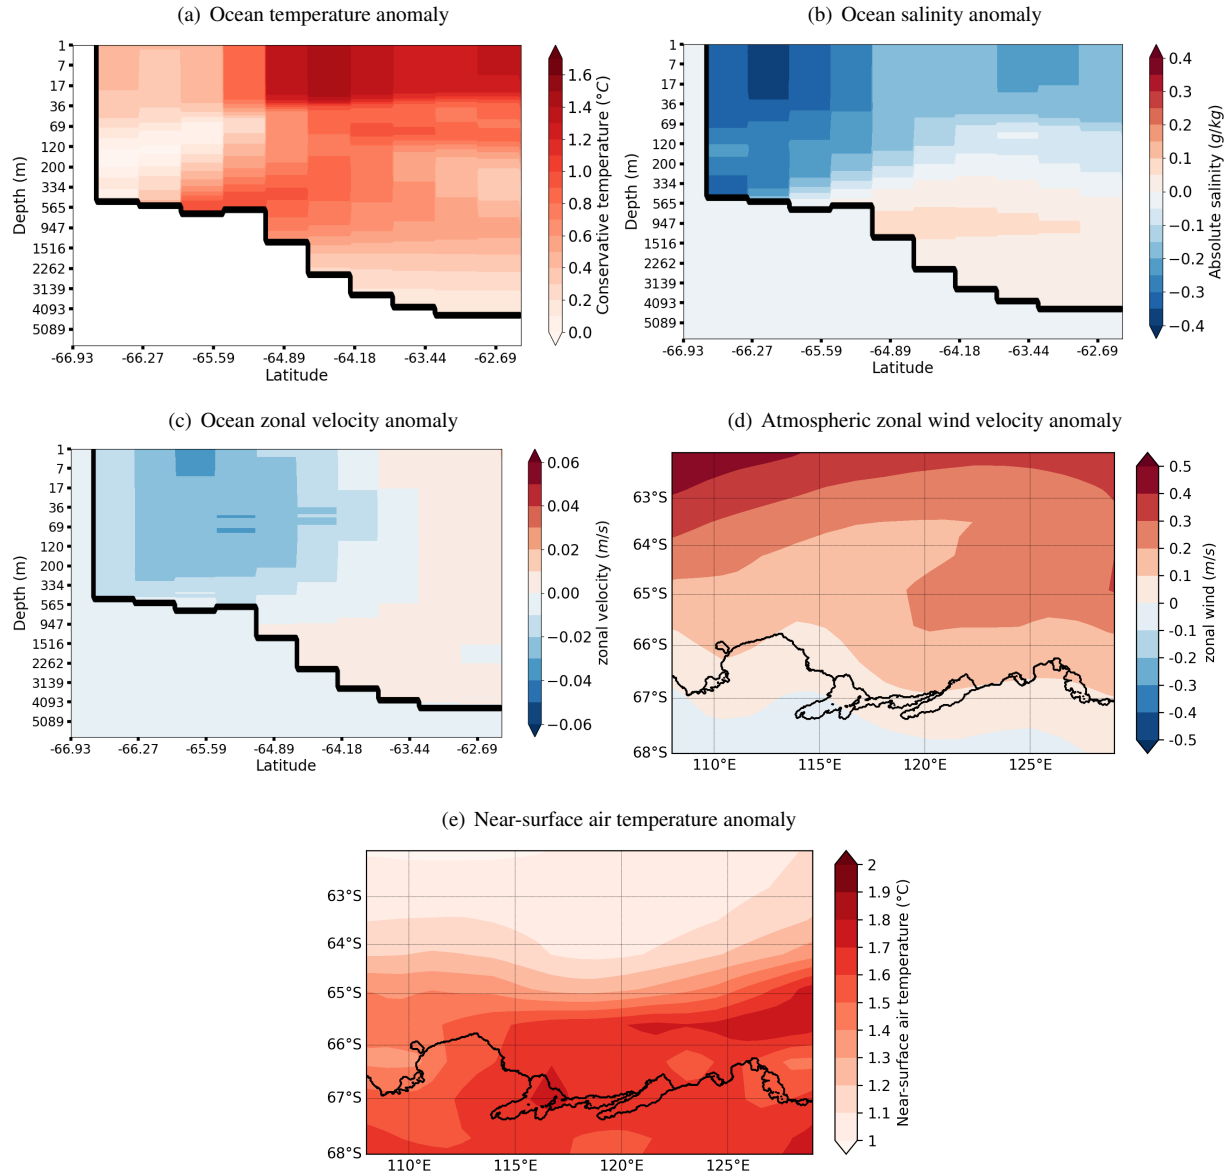

**Figure 3.** Annual mean EC-Earth3 anomalies applied at the eastern boundary of the model domain for the conservative temperature (a), absolute salinity (b) and the zonal component of the ocean velocity (c). Annual mean EC-Earth3 anomaly of the wind velocity (10 m) zonal component (d) and the near-surface (2 m) air temperature (e). The anomaly are computed between the 2081-2100 and the 1995-2014 periods.

|                   | Landfast ice      | Forcing and lateral boundary conditions                                               |
|-------------------|-------------------|---------------------------------------------------------------------------------------|
| REF               | yes               | Last decades (ERA5, PARASO, 1995-2014)                                                |
| WARM              | <del>no</del> yes | REF + anomalies derived from EC–Earth3 climate change projection                      |
| nFST              | yes <del>no</del> | Last decades (ERA5, PARASO, 1995-2014)                                                |
| nFST_WARM         | no                | REF + anomalies derived from EC–Earth3 climate change projection                      |
| <u>WARM_noAtm</u> | <u>yes</u>        | <u>WARM - atmospheric anomalies derived from EC–Earth3 climate change projection</u>  |
| <u>WARM_noOce</u> | <u>yes</u>        | <u>WARM - ocean velocity anomaly derived from EC–Earth3 climate change projection</u> |

**Table 1.** Names and descriptions of the simulations used in this study.

### 3 Results

In this section, we examine the main differences between the results from the REF and WARM simulations. Figures 4a and 4b display the geographical distribution of the fast ice frequency, defined as the percentage of days in a year with a 2-week mean sea ice velocity lower than 0.005 m/s. There is a large retreat of fast ice in WARM compared to REF in front of both the TIS and MUIS. In front of the TIS, the multiyear fast ice cover (frequency above 0.9) in REF is replaced by first year fast ice in WARM. On the other hand, the first year fast ice (frequency between 0.4-0.8) in REF is not at all present in WARM. The same frequency decrease occurs in front of the MUIS, most of the multiyear fast ice in REF becomes first year fast ice in WARM, with a 50% frequency reduction, and the first year fast ice in REF has vanished in WARM. The loss of the multiyear fast ice in WARM is mainly due to the atmospheric forcings, as hinted by the fast ice simulated in WARM\_noAtm presented in Figure A1, which is closer in both frequency and area to the fast ice simulated in REF than in WARM. As shown by Figure 4c to 4f, the changes in sea ice concentration over the continental shelf between REF and WARM mostly occur during summer months. In winter, changes are limited to the region off the continental shelf, with a general southward retreat of the ice edge in WARM.

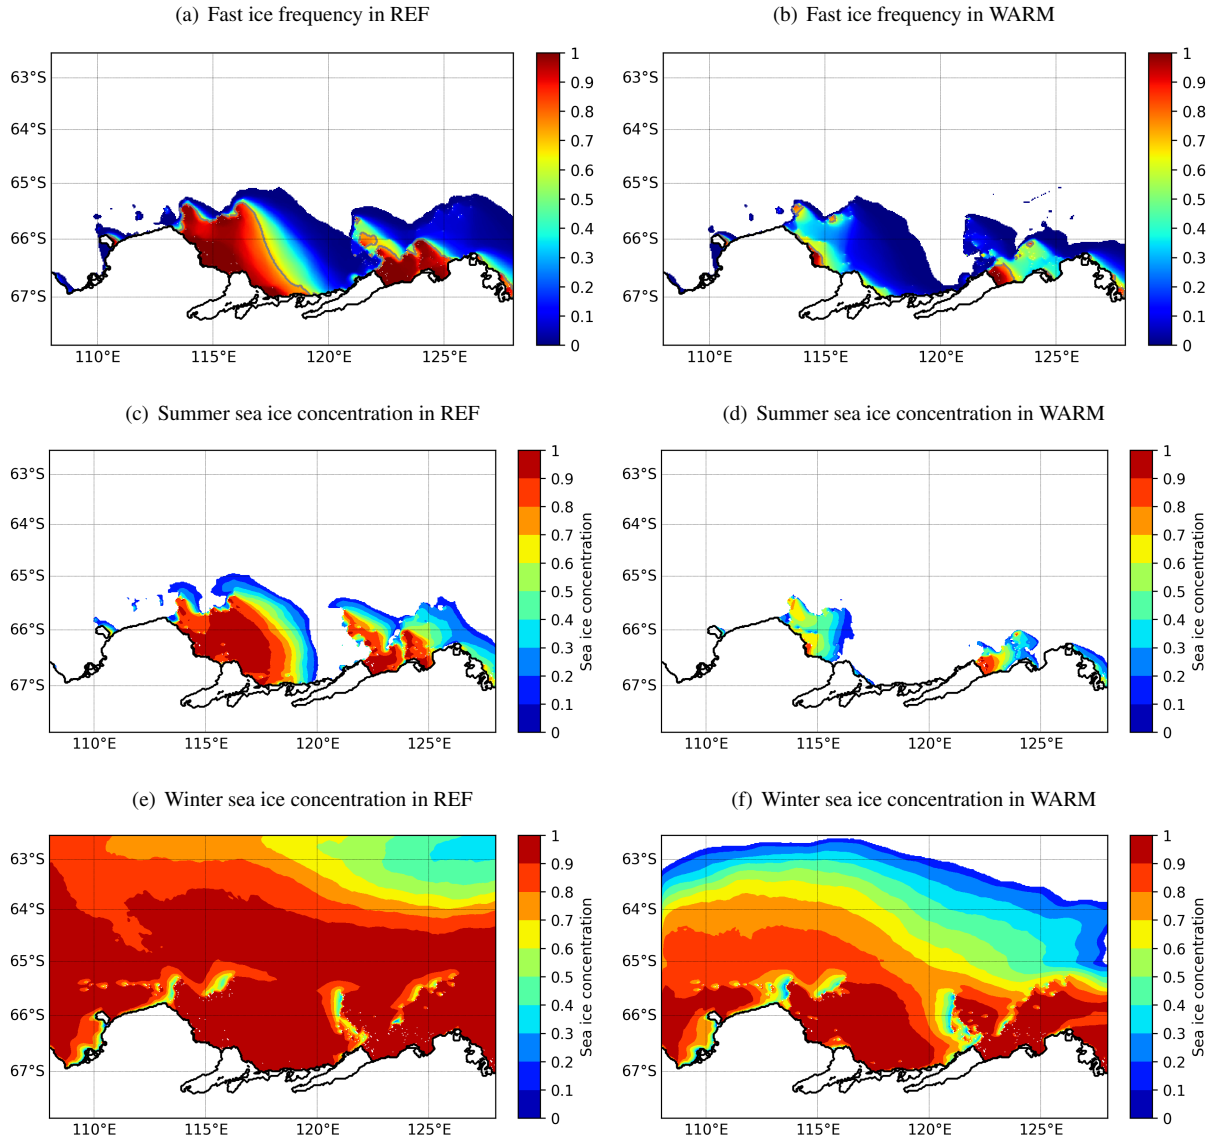

**Figure 4.** Fast sea ice frequency and sea ice concentration in summer (JFM) and winter (JASO) for the REF (left) and WARM (right) simulations, both averaged over the 20 years of ~~simulations~~simulation. The 0.75 fast ice frequency is shown by the gray line.

170

The differences in mean sea ice production between both simulations (see Fig. 5) exhibits important changes in sea ice production related to the fast ice changes presented above. The partial disintegration of multiyear fast ice in WARM induces more interactions between the cold atmospheric air and the ocean surface, which increases the sea ice production near the coast. This increase of sea ice production along the coast in WARM is counterbalanced by the decrease of sea ice production off shore, on the western side of the large fast ice packs that are present in REF but not in WARM.

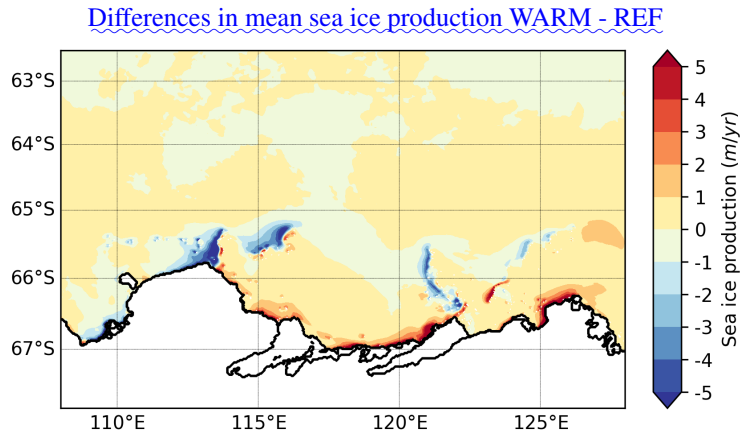

**Figure 5.** Differences in mean sea ice production between WARM and REF, averaged over the 20 years of simulations. Positive values mean that WARM has more sea ice production than REF.

Figures 6a and 6b reveal that the ocean circulation experiences major changes between REF and WARM. The ASC, which is barely present in REF, is strongly enhanced in WARM, especially in front of Law Dome and in front of the MUIS (the mean ocean velocity at the ASF is less than 0.1 m/s in REF and is close to 0.15 m/s in WARM). Furthermore, the Totten oceanic gyre in front of the TIS (clockwise oceanic circulation over the shelf) is intensified in WARM, especially its western and northern southern components. This acceleration mainly results from the retreat of fast ice, which acts as a dynamically isolating cover that inhibits the transmission of wind stress to the ocean (as suggested in Fig. A2). The integrated ocean transport at the southern edge of the gyre, near the front of the TIS cavity is increased by 226% in WARM compared to REF (from 0.55 to 1.8 Sv). This accelerated gyre speeds up the ocean masses entering the TIS cavity, which partly contributes to the increased basal melting. Figure 6c shows the annual mean, depth-integrated zonal oceanic volume transport for both REF and WARM, WARM\_noAtm and WARM\_noOce simulations. For each simulation, this mean transport is westwards everywhere (positive value) from the coast until 63°S, with a maximum value near 65°S where the ASC is located (at the shelf break). The eastern-eastward transport north of 63°S is associated with the Antarctic Circumpolar Current (ACC). REF and WARM exhibit the same transport pattern, but with a 90% increase 116% increase of the ASC in WARM compared to REF.

As suggested by the similar pattern of westward ocean transport between WARM and WARM\_noAtm (see Fig. 6c), the ASC intensification in WARM is not wind-driven. Indeed, as the pressure gradient across the ASF is enhanced by easterly winds that drive the sea surface height gradient via Ekman drift (Mathiot et al., 2011), an ASC intensification would require stronger easterly winds. Nevertheless, the EC-Earth3 wind velocity anomalies applied to the model in WARM are mostly positive (Fig. 3d), which weakens the easterly winds. This suggests a The ASC intensity difference between WARM and WARM\_noOce in Figure 6c indicates that the ocean velocity anomaly derived from EC-Earth3 and applied to the oceanic forcing in WARM are responsible for 83% of the ASC increased intensity. The remaining 17% of ASC increased intensity could have a density-driven origin for the ASC acceleration origin, as the lateral density gradient across the ASF contributes to establishing the geostrophically balanced, vertically sheared along-slope flows of the ASC (Lockwood et al., 2021). This

is coherent with the large density lowering over the continental shelf in WARM compared to REF, which leads to a stronger density gradient across the ASF (Fig. 6d). Since the seawater density is mostly a function of salinity in the Southern Ocean (Pellichero et al., 2018), the ASC modification should then be linked to the changes in sea ice production and melt occurring in WARM. This/These changes, in addition to the EC-Earth3 salinity anomalies prescribed at the eastern boundary of the domain (Fig. 3b), reduce the ocean salinity over the shelf.

As hinted by Nakayama et al. (2021), the ASC modulates the heat intrusion towards the continental shelf and the ice shelf cavities. The basal melt rate for both cavities for WARM and WARM\_noOce (see Fig. A3) shows higher melt rate with low ASC intensity (WARM\_noOce) and lower melt rate with high ASC intensity (WARM). This implies that, whereas the ocean and surface air temperature increase induces more basal melt rate, the ASC increased intensity decreases the heat intrusion towards the ice shelf cavities and limits the basal melt increase.

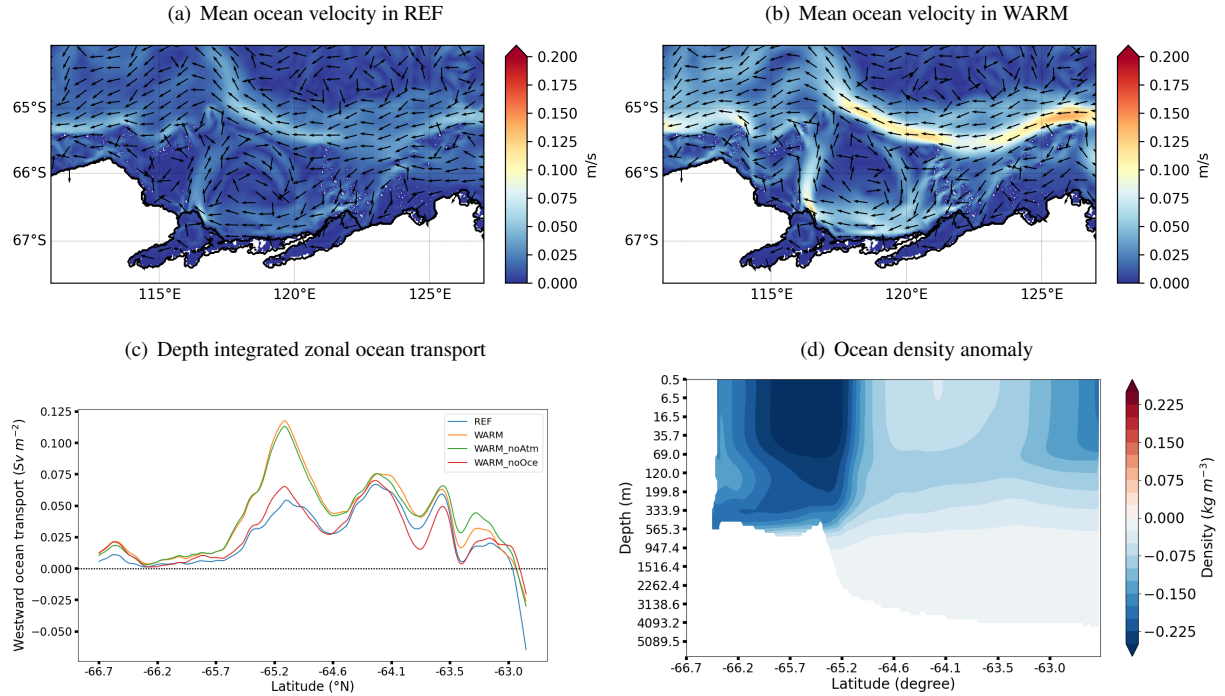

**Figure 6.** Annual mean, depth-averaged ocean velocity for the REF (a) and WARM (b) simulations, both averaged over the 20 years of simulation. (c) Annual mean, depth-integrated zonal ocean volume transport. (d) Meridional section of the ocean density change between WARM and REF(averaged over 125.3-126.6 E).

Figure 7 depicts the annual mean ocean temperature differences between WARM and REF (WARM - REF) over the continental shelf at 200, 300, 400 and 500 m depth. Despite an intensified ASC, which tends to isolate the continental shelf from the open ocean by reducing the across-shelf exchanges, the ocean temperature over the continental shelf in WARM features an overall increase. Figure 7a shows warmer water mostly everywhere at 200 m, with a slight warming (from 0.1 to 0.4° C) over the shelf and a larger warming (from 0.4 to 1° C) in the open ocean. Cooler waters are found on the eastern flank of the



MUIS cavity (from 0 to  $-0.2^{\circ}\text{C}$ ). The same pattern of temperature difference is noticed at 300 and 400 m (Fig. 7b and 7c), with a slight cooling next to MUIS and a strong warming in front of TIS, inside the Totten oceanic gyre, where the temperature increase reaches more than  $+1^{\circ}\text{C}$ . Deeper, at 500 m, the temperature difference in front of the MUIS becomes positive (up to  $+0.2^{\circ}\text{C}$ ), and the cooling in front of the MUIS is now restricted to the region east of  $126^{\circ}\text{E}$  (Fig. 7d). The difference of ocean warming between the front of the TIS and the front of MUIS is mostly due to the differences in bathymetry in the two areas. Indeed, both ice shelves present the same warmer ocean masses at the shelf break but ~~only~~ the deeper bathymetry in front of the TIS (up to 600 m) allows ~~the more~~ warming to reach the TIS cavity.

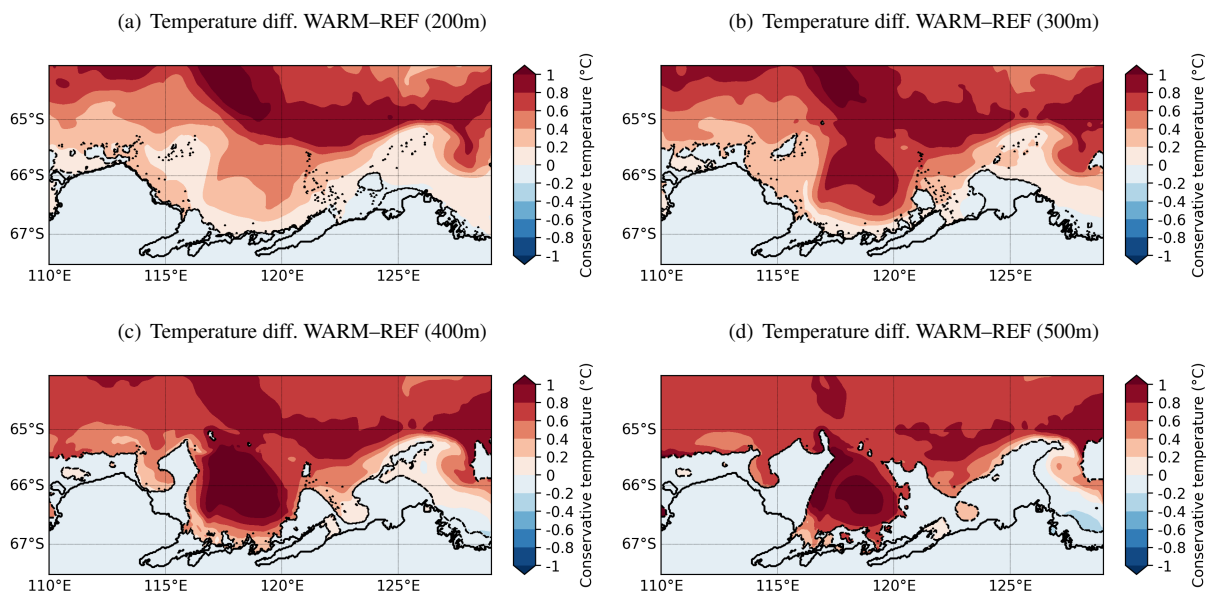

**Figure 7.** Annual mean ocean temperature differences between the WARM and REF simulations over the continental shelf at 200, 300, 400 and 500 m depths, all averaged over the 20 years of simulation. The dashed line depicts the contours of the bottom topography.

Finally, ~~Figure 8 displays~~ Figures 8a and 8b display the area-averaged ice shelf basal melt rate for both the TIS and MUIS from REF and WARM. The TIS experiences a larger (~~+41%~~91%) and more variable (~~+55%~~130% in standard deviation) basal melt rate in WARM, compared to REF. By contrast, the MUIS basal melt rate ~~is almost the same in both simulations (less than 1%~~ exhibits a lower basal melt rate increase (+36% increase in WARM), which with a lower basal melt rate variability increase (+33% in standard deviation). The lower basal melt increase in MUIS can be attributed to the lower ocean warming in front of the MUIS cavity, with less than  $+0.2^{\circ}\text{C}$  in front of MUIS compared to more than  $+1^{\circ}\text{C}$  in front of the TIS (see Figure 7). The increased temporal variability of both TIS and MUIS basal melt rates in WARM is not related to the loss of fast ice (see Tab. 2), but could be explained by the larger Mixed Layer Depth (MLD) variability in front of the cavities in WARM (see Fig. A4). This higher MLD variability is related to the greater amplitude of the surface air temperature seasonal cycle. The mixed layer in front of the cavity, by its impact on the ocean stratification, modulates the amount of warm water entering the cavities (Van Achter et al., 2022). The drop of basal melt rate in the sixth and seventh years is inherent to the ocean boundary

230 conditions. Figure 8c shows the differences in spatial distribution of the mean basal melt rate inside the TIS and MUIS cavities between both simulations. The melt rates increase spans from few meters a year to more than 45 meter of ice per year. The highest basal melt rate increase between REF and WARM are located on the western side of each cavities, near the grounding line, where the ocean circulation within the cavities is the fastest (up to +45m/yr in Totten and up to +20 m/yr in MUIS).

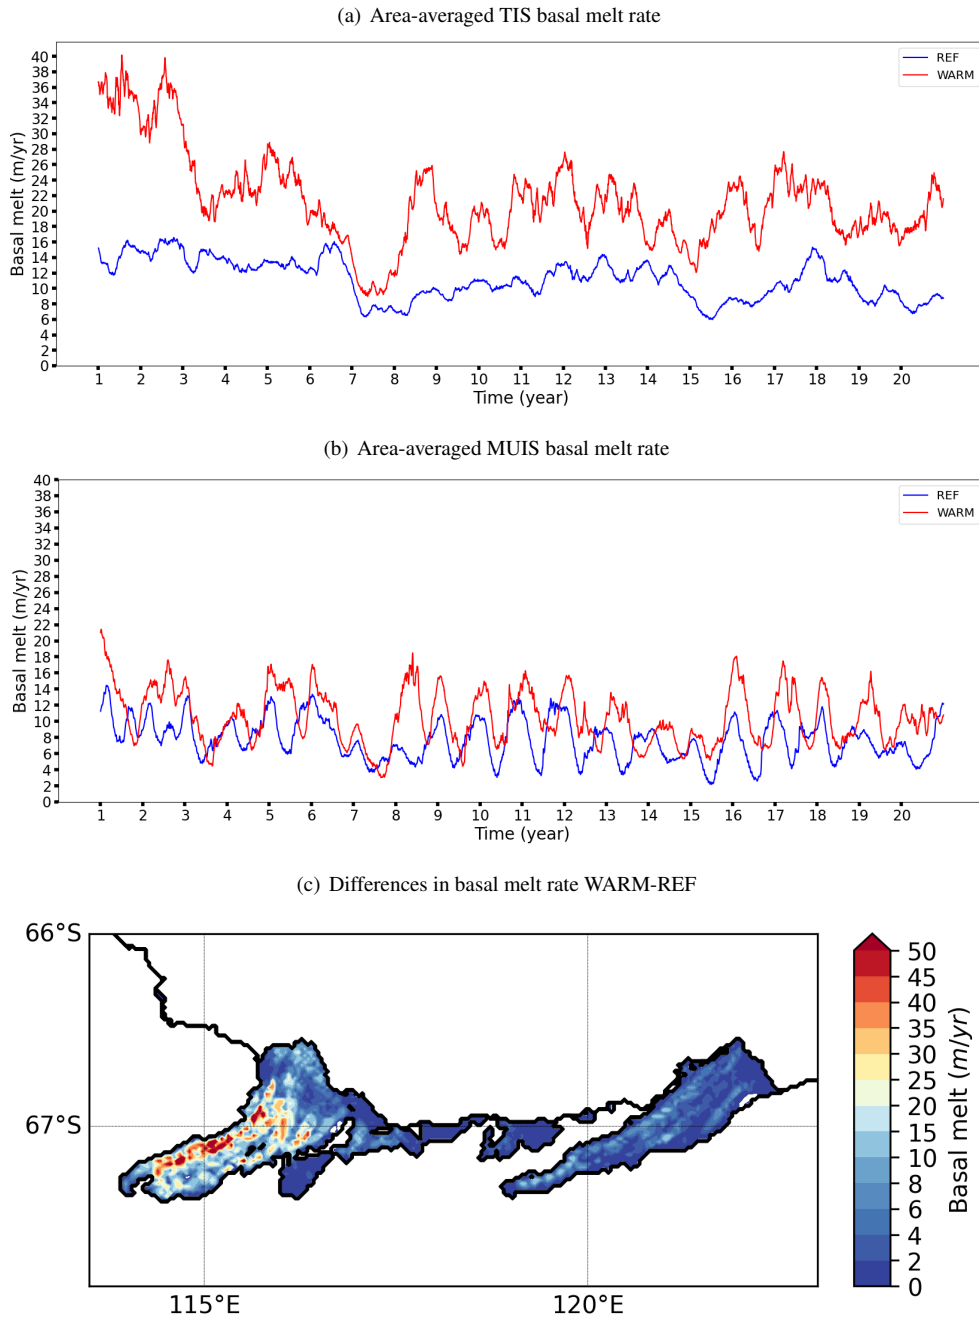

**Figure 8.** Time series of the area-averaged TIS (a) and MUIS (b) basal melt rates from REF (blue) and WARM (red). [Differences in spatial distribution of the basal melt rate between the REF and WARM simulations.](#) The time periods are 1995-2014 for REF and 2081-2100 for WARM. The mean TIS basal melt rate is  $9.06-11.13 \pm 4.64-2.54$  m/yr in REF and  $12.8-21.29 \pm 11.19-5.88$  m/yr in WARM, while the MUIS basal melt rate is  $5.9-7.73 \pm 5.42-2.51$  m/yr in REF and  $5.95-10.51 \pm 3.37-3.35$  m/yr in WARM.

#### 4 Ice shelves melt rate sensitivity to fast ice in a warming climate

235 In this section, we analyse how the presence of fast ice, implemented through the combination of both a sea ice tensile strength  
 parameterisation and a representation of grounded icebergs, impacts the changes in ice shelf basal melt rate between the last  
 decades and the end of the 21st century. The area-averaged TIS and MUIS basal melt rates for both nFST and nFST\_WARM  
 are shown in Figure 9. The TIS has a basal melt rate of  $8.09 \pm 3.08$  m/yr and  $12.78 \pm 13.34$  m/yr in nFST  
 and nFST\_WARM, respectively, whereas the MUIS has a mean basal melt rate of  $4.67 \pm 2.6$  m/yr and  $6.44 \pm 9.18$  m/yr  
 240  $4.67 \pm 9.18$  m/yr in nFST and nFST\_WARM, respectively.

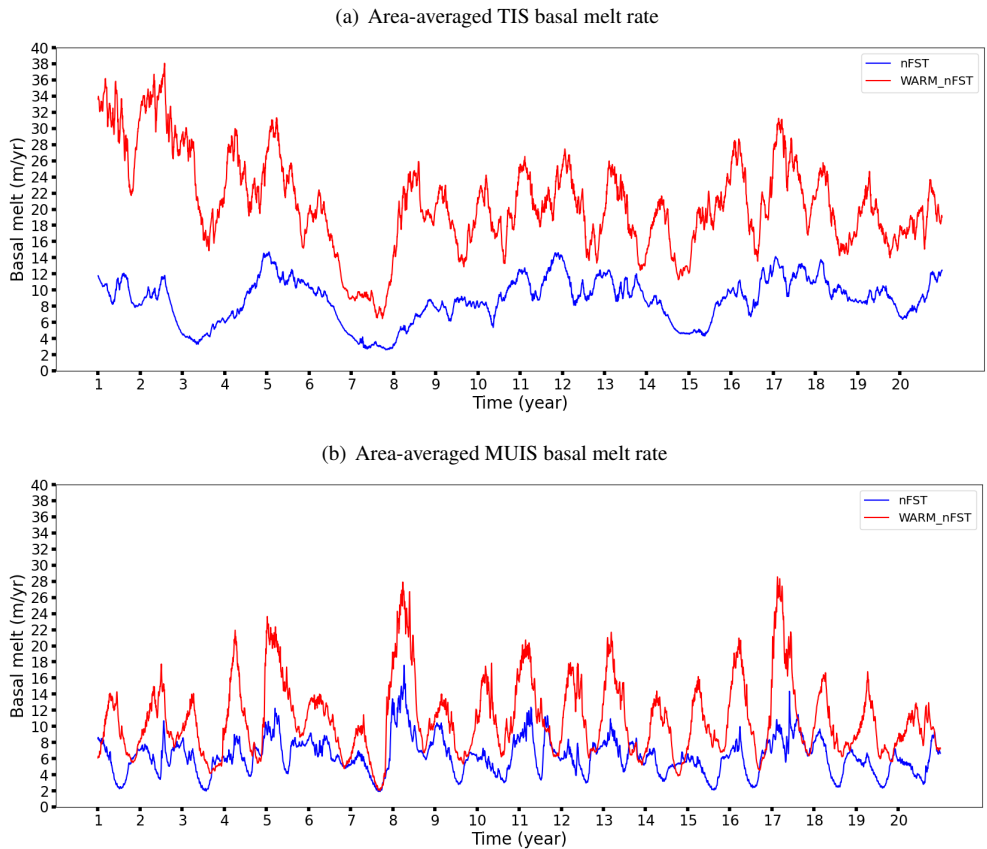

**Figure 9.** Time series of the area-averaged TIS (a) and MUIS (b) basal melt rates from nFST (blue) and nFST\_WARM (red). The timescale are 1995-2014 and 2018-2100 for the last decades simulations (blue) and the future climate conditions (red), respectively. The time period are 1995-2014 for nFST and 2081-2100 for nFST\_WARM. TIS melt rate are  $8.09 \pm 3.08$  m/yr in nFST and  $12.78 \pm 13.34$  m/yr in nFST\_WARM. MUIS melt rate are  $4.67 \pm 2.6$  m/yr in nFST and  $6.44 \pm 9.18$  m/yr in nFST\_WARM.

The mean melt rates at the base of the TIS and MUIS for all simulations are given in Table 2. Without fast ice representation, the increase in basal melt rate for both ice shelves between the two time periods is much larger. This is explained by both the strong impact of fast ice on the ice shelf basal melt rate. ~~Indeed, through the displacement of~~ for the last decades simulation

(more than 1.45 m/yr between REF and nFST) and by its small impact on the ice shelf basal melt rate by the end of the 21st century (less than 0.6 m/yr between WARM and WARM\_nFST). The strong fast ice impact on the basal melt rate in the last decades simulations is related to the displacement of the sea ice production zones (see Fig. A5), by the fast ice, from coastal to offshore areas, ~~the presence of fast ice~~. This change of sea ice production induces less sea ice production and more sea ice melt near the coast, which increases the ocean stratification in front of the cavities, favors warm water intrusions and increases the basal melt rate in REF compared to nFST (Van Achter et al., 2022). However, as the fast ice ~~disappears~~ shrinks under warmer oceanic and atmospheric conditions of the 21st century (Fig. 4a and 4b), this fast ice impact on the basal melt rate is strongly reduced. So, with lower ice shelf melt rates in nFST than in REF but with ~~similar melt rates in no significant melt rate changes~~ between WARM and nFST\_WARM, the simulations without a fast ice representation are showing a stronger ice shelf melt rate growth between the two periods. In other words, the effect of the reduced extent of fast ice on the ice shelf basal melt rate offsets part of the melt rate increase due to warmer atmospheric and oceanic conditions.

| Ice shelves       | fast ice | last decades (1995-2014)                                            | end of the 21st century (2081-2100)                                                                   |
|-------------------|----------|---------------------------------------------------------------------|-------------------------------------------------------------------------------------------------------|
| Totten            | yes      | <del>9.06</del> <u>11.13</u> $\pm$ <del>4.64</del> <u>2.54</u> m/yr | <del>12.8</del> <u>21.29</u> $\pm$ <del>11.19</del> <u>5.88</u> m/yr (+ <del>41%</del> <u>91%</u> )   |
|                   | no       | <del>8.09</del> <u>8.74</u> $\pm$ <del>3.08</del> <u>2.76</u> m/yr  | <del>12.78</del> <u>20.68</u> $\pm$ <del>13.34</del> <u>5.87</u> m/yr (+ <del>58%</del> <u>136%</u> ) |
| Moscow University | yes      | <del>5.9</del> <u>7.73</u> $\pm$ <del>5.42</del> <u>2.51</u> m/yr   | <del>5.95</del> <u>10.51</u> $\pm$ <del>3.37</del> <u>3.35</u> m/yr (+ <del>1%</del> <u>36%</u> )     |
|                   | no       | <del>4.67</del> <u>6.28</u> $\pm$ <del>2.6</del> <u>2.25</u> m/yr   | <del>6.44</del> <u>11.01</u> $\pm$ <del>9.18</del> <u>4.67</u> m/yr (+ <del>38%</del> <u>75%</u> )    |

**Table 2.** Mean ice shelf basal melt rates for both the last decades and the end of the 21st century and for all simulations.

The TIS and MUIS basal melt rates present a different sensitivity to fast ice. This is explained by both the unchanged MUIS basal melt rate in WARM compared to REF, and the higher MUIS basal melt rate in nFST\_WARM compared to WARM. Combined, these two effects contribute to a much larger basal melt rate increase between the simulations with and without fast ice for the MUIS than for the TIS (difference of 37% in melt rate increase for MUIS and 17% for TIS). The unchanged MUIS basal melt rate in WARM compared to REF is attributed to the limited effect of the ocean warming over the MUIS cavity, whereas the warmer ocean masses reaches the TIS cavity (Fig. 7d). This is explained by the differences in bathymetry in front of each ice shelf cavity. As described in Van Achter et al. (2022), in REF, the mCDW only reaches the TIS (not the MUIS), which results in an enhanced TIS basal melt rate and a lower MUIS melt rate. In the same way, in WARM, the warmer water masses reach the TIS, but are limited outside of the MUIS cavity, which limits the MUIS basal melt rate changes between REF and WARM. Finally, the higher MUIS basal melt rate in nFST\_WARM compared to WARM is attributed to the changes affecting the sea ice in WARM and nFST\_WARM. In nFST\_WARM, the absence of fast ice allows strong sea ice formation along the coast, with a deep ~~mixed layer depth (mld)~~ MLD in front of the MUIS cavity (Fig. 10c). In contrast, in WARM, the presence of fast ice allows for sea ice formation ~~along the coast but also~~ at the off-shore polynya created on the west side of fast ice patches in front of the MUIS cavity, ~~but it also allows strong sea ice production along the coast since the fast ice along the coast is strongly reduced in area and frequency~~. This combination of sea formation both off-shore and along the coast contributes to a broader area of deep ~~mld~~ MLD in front of the MUIS cavity in WARM (Fig. 10d), which decreases the amount

of warm water able to cross the continental shelf and to reach the MUIS cavity in WARM compared to nFST\_WARM (Fig. 10a and 10b). As a consequence, the MUIS basal melt rate in WARM is lower than in nFST\_WARM.

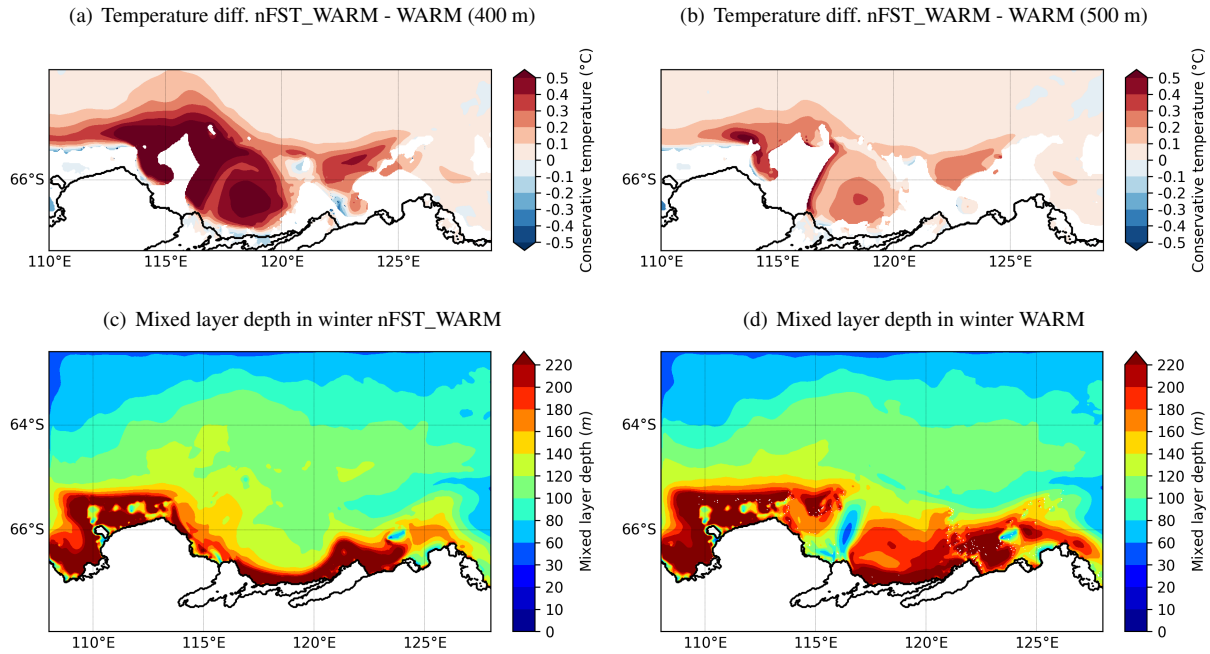

**Figure 10.** Annual mean ocean temperature differences between the nFST\_WARM and WARM simulations over the continental shelf at 400 (a) and 500 m depths (b). Annual mean ~~mld~~-MLD for nFST\_WARM (c) and WARM (d) for the winter months (JASO). Both the temperature anomalies and the ~~mld~~-MLD are averaged over the 20 years simulation.

## 5 Discussion and conclusions

The first goal of this study was to investigate the ocean–ice shelf interactions under warmer climate conditions in the Totten  
 275 Glacier region. To do so, we applied climate anomalies, obtained from a SSP4-4.5 climate change projection conducted with  
 EC-Earth3, at the oceanic boundary conditions and atmospheric forcing of a NEMO-LIM high-resolution, regional config-  
 uration, which includes an explicit treatment of ocean–ice shelf interactions and a fast ice representation. Our experiments  
 revealed major changes in ice shelf basal melt rate, sea ice production and ocean circulation between last decades (1995-2014)  
 and the end of the 21st century (2081-2100). The ~~TIS undergoes~~ sea ice extent is reduced in both summer and winter, with a  
 280 general southward retreat of the ice edge. The fast ice forms less frequently and its coverage is strongly reduced. Both TIS and  
MUIS underwent a drastic basal melt increase (41%), ~~while the MUIS basal melt rate remains almost unchanged (less than~~  
~~1% increase)~~ with a 91% and 36% increase, respectively. Such change in the ~~TIS ice shelf~~ basal melt rate can be attributed  
 to warmer mCDW (~~with more than +1°C~~ ) ~~reaching its cavity~~ . ~~On the other hand, these~~ of ocean warming in front of the  
TIS cavity and up to +0.2°C in front of the MUIS cavity. The warmer ocean conditions ~~do not affect~~ have a lesser effect on

285 the MUIS basal melt rate, mainly because of the shallower bathymetry in front of its cavity (~~less than  $+0.2^{\circ}\text{C}$~~ ). ~~The warmer atmospheric and oceanic conditions strongly impact the sea ice in the projection run. The fast ice forms less frequently and its coverage is strongly reduced. The sea ice extent is also reduced in both summer and winter,~~ but also because of the accelerated gyre in front of the TIS cavity, whose acceleration is due to the disintegration of fast ice. This accelerated gyre speeds up the ocean masses entering the TIS cavity and contributes to the basal melt rate increase. In the ocean, the ASC is largely intensified, with an oceanic zonal volume transport ~~almost twice larger in WARM than in REF. The~~ that is increased by 116% in WARM compared to REF. This increase velocity of the ASC ~~seems to be due to the change is attributed to both the EC-Earth3 ocean velocity anomaly applied to the ocean forcings (83%) and to the changes~~ in density gradient (mostly salinity) across the shelf (17%), triggered by both the sea ice production modification and the changes in ocean lateral boundary conditions. The accelerated ASC reduces the cross-slope water exchanges and has a basal melt rate reducing effect in both ice shelf cavities.

295 The second goal of this study was to determine how fast ice influences the increase in ice shelf basal melt rate between the last decades and the end of the 21st century. The representation of fast ice, through the combination of both a sea ice tensile strength parameterisation and the representation of grounded icebergs, has been shown to offset the basal melt rate increase simulated between the last decades and the end of the 21st century. Indeed, for ~~both the TIS and MUIS~~ the TIS, the average last decades melt rates are higher with the fast ice representation but ~~are similar~~ have no significant differences by the end of the 300 21st century, whether or not there is the fast ice representation. For MUIS, it is a similar case, except that the end of the 21st century basal melt rate is slightly lower with the fast ice representation due to spatial changes in the MLD. The fast ice impact on the melt rate drops as the fast ice extent is reduced due to the warmer oceanic and atmospheric conditions by the end of the 21st century. So, with higher melt rate values for the last decades, but with similar melt rate values by the end of the 21st century, the simulations with fast ice have a lower melt rate growth between the two periods than the simulations without a fast 305 ice representation. This enlightened the importance of fast ice, not for studying melt rate by the end of the 21st century alone, but for studying the evolution of basal melt rate across the 21st century.

Few other studies investigate the ice shelf melt rate increase between present days and the end of the 21st century in the Totten Glacier area. Moreover, the amount of melt rate increase is strongly linked to the model, initial conditions and climate change scenario used to force the model. ~~Pelle et al. (2021) simulate a TIS basal melt rate increase of 56% following a high emission scenario, which compares well with our 58% TIS basal melt rate increase (without fast ice). Nevertheless, their simulations present an ASC weakening linked to a freshening at the eastern ocean model boundary, which is the opposite of what we observe in WARM. As~~ Furthermore, as recent studies are suggesting both strengthening and weakening of the ASC in the future (Moorman et al., 2020; Pelle et al., 2021), we should aim for better understanding of the ASC changes in East Antarctica.

315 One of the main limitations of our study lies in the lack of knowledge about the grounded iceberg distribution by the end of the 21st century. In the absence of a day-to-day high-resolution iceberg map, we ~~were forced to use~~ used a 2-month icebergs dataset (September–October months of 1997) to prescribe the grounded iceberg location for both the REF (1995–2014) and WARM (2081–2100) simulations. However, a change in the iceberg distribution between REF and WARM might influence the results presented here. Indeed, a modification of the iceberg density in front of the TIS and MUIS cavities could either increase

320 or decrease the fast ice distribution over the continental shelf, and consequently influence how the fast ice change damps the ice shelf basal melt rate under warming conditions. Another limitation in our experimental design, is the use of only one climate change projection. Still about the experimental design, the REF and WARM simulations have the same interannual variability (because WARM is REF with EC–Earth3 anomalies). A WARM simulation with its own interannual variability might change how the TIS and MUIS basal melt rates are enhanced in WARM. ~~Finally~~Moreover, since these results are strongly linked to local processes, it would be interesting to look at the same mechanisms but in other regions of East Antarctica. Finally, ASC analysis should be made on a wider scale and on other regions. Because, even if the ASC intensification in WARM is not wind-driven, the winds outside of the local domain should be part of the ASC driven force.

Overall, the ~~density-driven ASC acceleration highlights the~~ASC acceleration and its effect on the basal melt rate highlight the benefits of high-resolution and accurate continental shelf bathymetric datasets in order to represent lateral density gradients associated with the ASF, and thus to simulate realistically the ASC. This is a major challenge for global climate models, whose relatively coarse resolution prevents such phenomena from being accurately represented (Lockwood et al., 2021). Furthermore, our results underline the worth of a prognostic fast ice representation to simulate ~~future~~ice shelf melt rate evolution in Antarctica. In contrast to the prescribed fast ice, the prognostic approach enables the fast ice extent to evolve in time (Nihashi and Ohshima, 2015; Van Achter et al., 2022). The prognostic representation of fast ice, with time-evolving grounded iceberg locations should be one of the key focus in high-resolution ocean-sea ice modelling in East Antarctica for the years to come.

## Appendix A

Figure A1 presents the fast ice frequency in WARM\_noAtm. As the fast ice frequency and area in WARM\_noAtm are closer to the ones of REF that of WARM, it suggests that the changes in fast ice between REF and WARM are mainly due to the changes in atmospheric forcings between REF and WARM.

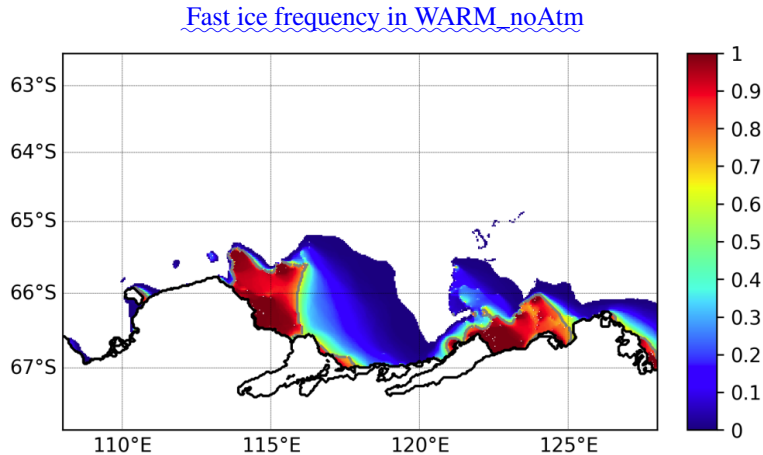

**Figure A1.** Fast ice frequency for the WARM\_noAtm simulation, averaged over the 20 years of simulation.



Figure A2, which shows the mean ocean barotropic velocity for the REF and nFST simulations, suggests that the acceleration of the Totten oceanic gyre is related to the absence of fast ice in front of the TIS cavity.

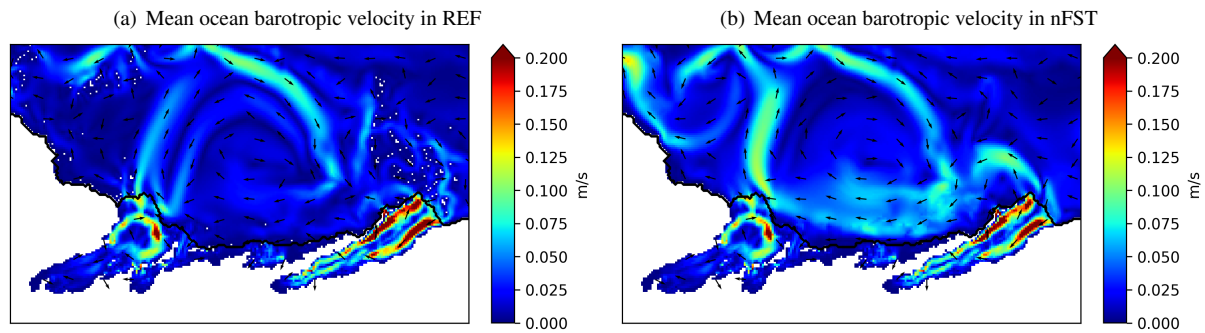

**Figure A2.** Mean ocean barotropic velocity for the REF (a) and nFST (b) simulations, average over the 1995-2014 period.

Figure A3, which shows the basal melt rate for the TIS and MUIS in WARM and WARM\_noOce, indicates that the accelerated ASC decreases the basal melt rate in both cavities.

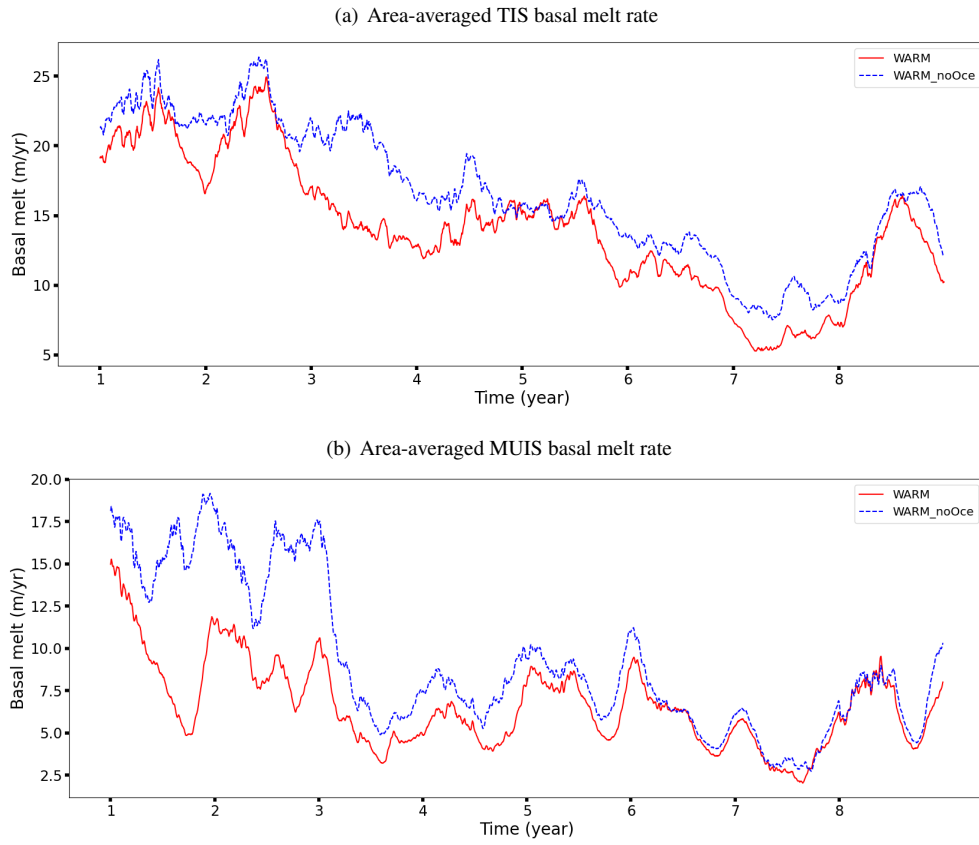

**Figure A3.** Time series of the area-averaged TIS (a) and MUIS (b) basal melt rate from WARM (red) and WARM\_noOce (dotted blue) for the first 8 years of simulations.

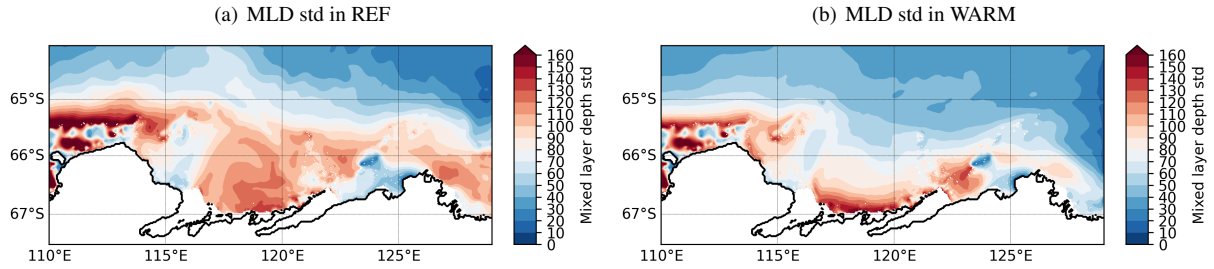

**Figure A4.** Standard deviation of the mixed layer depth for both REF (a) and WARM (b).

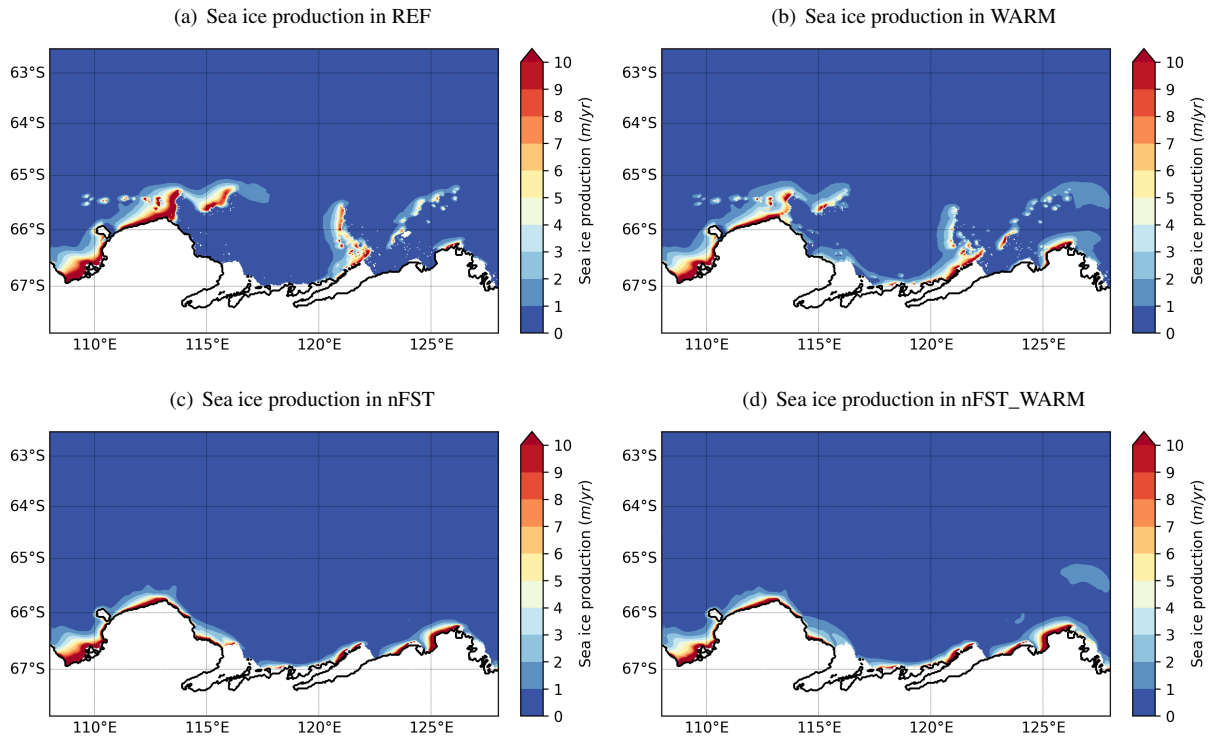

**Figure A5.** Mean sea ice production for REF (a), WARM (b), nFST (c) and nFST\_WARM (d), all averaged over the 20 years of simulation.

345 *Author contributions.* GVA designed the science plan with TF and HG, ran the simulations, produced the figures, analysed the results and wrote the manuscript based on insights from all co-authors. EMC provided the EC–Earth3 dataset.

*Competing interests.* The authors declare that they have no known competing financial interests or personal relationships that could have appeared to influence the work reported in this paper.

350 *Acknowledgements.* This project (EOS O0100718F) has received funding from the FWO, Belgium and F.R.S.-FNRS, Belgium under the Excellence of Science (EOS) programme. HG is research director with the F.R.S-FNRS (Belgium). Computational resources have been provided by the supercomputing facilities of the Université catholique de Louvain (CISM/UCL) and the Consortium des Equipements de Calcul Intensif en Fédération Wallonie Bruxelles (CECI) funded by the Fond de la Recherche Scientifique de Belgique, Belgium (F.R.S.-FNRS) under convention 2.5020.11. The present research benefited from computational resources made available on the Tier-1 supercomputer of the Fédération Wallonie-Bruxelles, infrastructure funded by the Walloon Region under the grant agreement n117545.

- Adcroft, A., Hill, C., and Marshall, J.: Representation of Topography by Shaved Cells in a Height Coordinate Ocean Model, *Mon. Weather Rev.*, 125, 2293 – 2315, [https://doi.org/10.1175/1520-0493\(1997\)125<2293:ROTBSC>2.0.CO;2](https://doi.org/10.1175/1520-0493(1997)125<2293:ROTBSC>2.0.CO;2), 1997.
- Aitken, A. R. A., Roberts, J. L., Ommen, T. D. v., Young, D. A., Golledge, N. R., Greenbaum, J. S., Blankenship, D. D., and Siebert, M. J.: Repeated large-scale retreat and advance of Totten Glacier indicated by inland bed erosion, *Nature*, 533, 385–389, <https://doi.org/10.1038/nature17447>, 2016.
- 360 Bitz, C. M., Holland, M. M., Weaver, A. J., and Eby, M.: Simulating the ice-thickness distribution in a coupled climate model, *J. Geophys. Res. Oceans*, 106, 2441–2463, <https://doi.org/10.1029/1999JC000113>, 2001.
- Bougeault, P. and Lacarrere, P.: Parameterization of Orography-Induced Turbulence in a Mesobeta-Scale Model, *Monthly Weather Review*, 117, 1872–1890, [https://doi.org/10.1175/1520-0493\(1989\)117<1872:POOITI>2.0.CO;2](https://doi.org/10.1175/1520-0493(1989)117<1872:POOITI>2.0.CO;2), 1989.
- 365 Carrère, L., Lyard, F., Cancet, M., Guillot, A., and Roblou, L.: A new global tidal model taking taking advantage of nearly 20 years of altimetry., *Proceedings of meeting "20 Years of Altimerty"*, <https://ui.adsabs.harvard.edu/abs/2013ESASP.710E..13C/abstract>, 2012.
- Dansereau, V., Heimbach, P., and Losch, M.: Simulation of subice shelf melt rates in a general circulation model: Velocity-dependent transfer and the role of friction, *J. Geophys. Res. Oceans*, 119, 1765–1790, <https://doi.org/10.1002/2013JC008846>, 2014.
- Döscher, R., Acosta, M., Alessandri, A., Anthoni, P., Arneth, A., Arsouze, T., Bergmann, T., Bernadello, R., Bousetta, S., Caron, L.-P., 370 Carver, G., Castrillo, M., Catalano, F., Cvijanovic, I., Davini, P., Dekker, E., Doblas-Reyes, F. J., Docquier, D., Echevarria, P., Fladrich, U., Fuentes-Franco, R., Gröger, M., v. Hardenberg, J., Hieronymus, J., Karami, M. P., Keskinen, J.-P., Koenigk, T., Makkonen, R., Massonnet, F., Ménégos, M., Miller, P. A., Moreno-Chamarro, E., Nieradzki, L., van Noije, T., Nolan, P., O'Donnell, D., Ollinaho, P., van den Oord, G., Ortega, P., Prims, O. T., Ramos, A., Reerink, T., Rousset, C., Ruprich-Robert, Y., Le Sager, P., Schmith, T., Schrödner, R., Serva, F., Sicardi, V., Sloth Madsen, M., Smith, B., Tian, T., Tourigny, E., Uotila, P., Vancoppenolle, M., Wang, S., Wärlind, D., Willén, U., Wyser, 375 K., Yang, S., Yepes-Arbós, X., and Zhang, Q.: The EC-Earth3 Earth System Model for the Climate Model Intercomparison Project 6, *Geoscientific Model Development Discussions*, 2021, 1–90, <https://doi.org/10.5194/gmd-2020-446>, 2021.
- Engedahl, H.: Use of the flow relaxation scheme in a three-dimensional baroclinic ocean model with realistic topography, *Tellus A: Dynamic Meteorology and Oceanography*, 47, 365–382, <https://doi.org/10.3402/tellusa.v47i3.11523>, 1995.
- Eyring, V., Bony, S., Meehl, G. A., Senior, C. A., Stevens, B., Stouffer, R. J., and Taylor, K. E.: Overview of the Coupled Model 380 Intercomparison Project Phase 6 (CMIP6) experimental design and organization, *Geoscientific Model Development*, 9, 1937–1958, <https://doi.org/10.5194/gmd-9-1937-2016>, 2016.
- Flather, R. A.: A Storm Surge Prediction Model for the Northern Bay of Bengal with Application to the Cyclone Disaster in April 1991, *J. Phys. Oceanogr.*, 24, 172–190, [https://doi.org/10.1175/1520-0485\(1994\)024<0172:ASSPMF>2.0.CO;2](https://doi.org/10.1175/1520-0485(1994)024<0172:ASSPMF>2.0.CO;2), 1994.
- Fraser, A. D., Massom, R. A., Michael, K. J., Galton-Fenzi, B. K., and Lieser, J. L.: East Antarctic Landfast Sea Ice Distribution and 385 Variability, 2000–08, *J. Climate*, 25, 1137–1156, <https://doi.org/10.1175/JCLI-D-10-05032.1>, 2012.
- Fraser, A. D., Massom, R. A., Ohshima, K. I., Willmes, S., Kappes, P. J., Cartwright, J., and Porter-Smith, R.: High-resolution mapping of circum-Antarctic landfast sea ice distribution, 2000–2018, *Earth Syst. Sci. Data*, 12, 2987–2999, <https://doi.org/10.5194/essd-12-2987-2020>, 2020.
- Gaspar, P., Grégoris, Y., and Lefevre, J.-M.: A simple eddy kinetic energy model for simulations of the oceanic vertical mixing: Tests at station 390 Papa and long-term upper ocean study site, *J. Geophys. Res. Oceans*, 95, 16 179–16 193, <https://doi.org/10.1029/JC095iC09p16179>, 1990.

- Greenbaum, J. S., Blankenship, D. D., Young, D. A., Richter, T. G., Roberts, J. L., Aitken, A. R. A., Legresy, B., Schroeder, D. M., Warner, R. C., van Ommen, T. D., and Siegert, M. J.: Ocean access to a cavity beneath Totten Glacier in East Antarctica, *Nature Geoscience*, 8, 294–298, <https://doi.org/10.1038/ngeo2388>, 2015.
- Greene, C. A., Young, D. A., Gwyther, D. E., Galton-Fenzi, B. K., and Blankenship, D. D.: Seasonal dynamics of Totten Ice Shelf controlled by sea ice buttressing, *The Cryosphere*, 12, 2869 – 2882, <https://doi.org/10.5194/tc-12-2869-2018>, 2018.
- Hellmer, H. H., Kauker, F., Timmermann, R., Determann, J., and Rae, J.: Twenty-first-century warming of a large Antarctic ice-shelf cavity by a redirected coastal current, *Nature*, 485, 225–228, <https://doi.org/10.1038/nature11064>, 2012.
- Hersbach, H., Bell, B., Berrisford, P., Hirahara, S., Horányi, A., Muñoz-Sabater, J., Nicolas, J., Peubey, C., Radu, R., Schepers, D., Simmons, A., Soci, C., Abdalla, S., Abellan, X., Balsamo, G., Bechtold, P., Biavati, G., Bidlot, J., Bonavita, M., De Chiara, G., Dahlgren, P., Dee, D., Diamantakis, M., Dragani, R., Flemming, J., Forbes, R., Fuentes, M., Geer, A., Haimberger, L., Healy, S., Hogan, R. J., Hólm, E., Janisková, M., Keeley, S., Laloyaux, P., Lopez, P., Lupu, C., Radnoti, G., de Rosnay, P., Rozum, I., Vamborg, F., Villaume, S., and Thépaut, J.-N.: The ERA5 global reanalysis, *Q. J. R. Meteorol. Soc.*, 146, 1999–2049, <https://doi.org/10.1002/qj.3803>, 2020.
- Huot, P.-V., Fichefet, T., Jourdain, N. C., Mathiot, P., Rousset, C., Kittel, C., and Fettweis, X.: Influence of ocean tides and ice shelves on ocean–ice interactions and dense shelf water formation in the D’Urville Sea, Antarctica, *Ocean Model.*, 162, 101794, <https://doi.org/https://doi.org/10.1016/j.ocemod.2021.101794>, 2021.
- IOC: The International thermodynamic equation of seawater: calculation and use of thermodynamic properties, Tech. rep., UNESCO, <https://unesdoc.unesco.org/ark:/48223/pf0000188170>, intergovernmental Oceanographic Commission, 2010.
- Jacobs, S. S.: On the nature and significance of the Antarctic Slope Front, *Marine Chemistry*, 35, 9–24, [https://doi.org/https://doi.org/10.1016/S0304-4203\(09\)90005-6](https://doi.org/https://doi.org/10.1016/S0304-4203(09)90005-6), biochemistry and circulation of water masses in the Southern Ocean, 1991.
- Jenkins, A.: A one-dimensional model of ice shelf-ocean interaction, *J. Geophys. Res.*, 96, 20671–20677, <https://doi.org/10.1029/91JC01842>, 1991.
- Jezek, K. C., Curlander, J. C., Carsey, F., Wales, C., and Barry, R. G.: RAMP AMM-1 SAR Image Mosaic of Antarctica, Version 2. [Indicate subset used], Boulder, Colorado USA. NASA National Snow and Ice Data Center Distributed Active Archive Center, <https://doi.org/10.5067/8AF4ZRPULS4H>, 2013.
- Jourdain, N. C., Mathiot, P., Merino, N., Durand, G., Le Sommer, J., Spence, P., Dutrieux, P., and Madec, G.: Ocean circulation and sea-ice thinning induced by melting ice shelves in the Amundsen Sea, *J. Geophys. Res. Oceans*, 122, 2550–2573, <https://doi.org/10.1002/2016JC012509>, 2017.
- Jourdain, N. C., Molines, J.-M., Le Sommer, J., Mathiot, P., Chanut, J., de Lavergne, C., and Madec, G.: Simulating or prescribing the influence of tides on the Amundsen Sea ice shelves, *Ocean Model.*, 133, 44 – 55, <https://doi.org/10.1016/j.ocemod.2018.11.001>, 2019.
- Khazendar, A., Schodlok, M., Fenty, I., Ligtenberg, S., Rignot, E., and van den Broeke, M.: Observed thinning of Totten Glacier is linked to coastal polynya variability, *Nat. Commun.*, 4, <https://doi.org/10.1038/ncomms3857>, 2013.
- Large, W. and Yeager, S.: Diurnal to decadal global forcing for ocean and sea-ice models: the data sets and flux climatologie, UCAR, <https://doi.org/10.5065/D6KK98Q6>, 2004.
- Lemieux, J.-F., Dupont, F., Blain, P., Roy, F., Smith, G. C., and Flato, G. M.: Improving the simulation of landfast ice by combining tensile strength and a parameterization for grounded ridges, *J. Geophys. Res. Oceans*, 121, 7354–7368, <https://doi.org/10.1002/2016JC012006>, 2016.

- Lockwood, J. W., Dufour, C. O., Griffies, S. M., and Winton, M.: On the Role of the Antarctic Slope Front on the Occurrence of the Weddell Sea Polynya under Climate Change, *Journal of Climate*, 34, 2529 – 2548, <https://doi.org/10.1175/JCLI-D-20-0069.1>, 2021.
- 430 Losch, M.: Modeling ice shelf cavities in a z coordinate ocean general circulation model, *J. Geophys. Res. Oceans*, 113, <https://doi.org/10.1029/2007JC004368>, 2008.
- Madec, G.: NEMO ocean engine, Note du Pole de modelisation, Institut Pierre-Simon Laplace (IPSL), France, No 27, ISSN No 1288-1619, 2008.
- Madec, G., Delecluse, P., Imbard, M., and Levy, C.: 1 Ocean General Circulation Model reference manual, 1998.
- 435 Maraldi, C., Chanut, J., Levier, B., Ayoub, N., De Mey, P., Reffray, G., Lyard, F., Cailleau, S., Drévilion, M., Fanjul, E. A., Sotillo, M. G., Marsaleix, P., the Mercator Research, and Team, D.: NEMO on the shelf: assessment of the Iberiandash;Biscayndash;Ireland configuration, *Ocean Sci.*, 9, 745–771, <https://doi.org/10.5194/os-9-745-2013>, 2013.
- Massom, R. A., Hill, K. L., Lytle, V. I., Worby, A. P., Paget, M., and Allison, I.: Effects of regional fast-ice and iceberg distributions on the behaviour of the Mertz Glacier polynya, East Antarctica, *Ann. Glaciol.*, 33, 391–398, <https://doi.org/10.3189/172756401781818518>, 440 2001.
- Massonnet, F., Goosse, H., Fichefet, T., and Counillon, F.: Calibration of sea ice dynamic parameters in an ocean-sea ice model using an ensemble Kalman filter, *Journal of Geophysical Research: Oceans*, 119, 4168–4184, <https://doi.org/10.1002/2013JC009705>, 2014.
- Mathiot, P., Goosse, H., Fichefet, T., Barnier, B., and Gallée, H.: Modelling the seasonal variability of the Antarctic Slope Current, *Ocean Science*, 7, 455–470, <https://doi.org/10.5194/os-7-455-2011>, 2011.
- 445 Mathiot, P., Jenkins, A., Harris, C., and Madec, G.: Explicit representation and parametrised impacts of under ice shelf seas in the  $z^*$  coordinate ocean model NEMO 3.6, *Geosci. Model Dev.*, 10, 2849–2874, <https://doi.org/10.5194/gmd-10-2849-2017>, 2017.
- Moorman, R., Morrison, A. K., and Hogg, A. M.: Thermal Responses to Antarctic Ice Shelf Melt in an Eddy-Rich Global Ocean–Sea Ice Model, *Journal of Climate*, 33, 6599 – 6620, <https://doi.org/10.1175/JCLI-D-19-0846.1>, 2020.
- Morlighem, M., Rignot, E., Binder, T., Blankenship, D., Drews, R., Eagles, G., Eisen, O., Forsberg, R., Fretwell, P., Goel, V., Greenbaum, J., 450 Gudmundsson, G., Guo, J., Helm, V., Hofstede, C., Howat, I., Humbert, A., Jokat, W., and Young, D.: Deep glacial troughs and stabilizing ridges unveiled beneath the margins of the Antarctic ice sheet, *Nat. Geosci.*, 13, 1–6, <https://doi.org/10.1038/s41561-019-0510-8>, 2020.
- Nakayama, Y., Greene, C. A., Paolo, F. S., Mensah, V., Zhang, H., Kashiwase, H., Simizu, D., Greenbaum, J. S., Blankenship, D. D., Abe-Ouchi, A., and Aoki, S.: Antarctic Slope Current Modulates Ocean Heat Intrusions Towards Totten Glacier, *Geophysical Research Letters*, 48, e2021GL094 149, <https://doi.org/10.1029/2021GL094149>, 2021.
- 455 Naughten, K. A., Meissner, K. J., Galton-Fenzi, B. K., England, M. H., Timmermann, R., and Hellmer, H. H.: Future Projections of Antarctic Ice Shelf Melting Based on CMIP5 Scenarios, *Journal of Climate*, 31, 5243 – 5261, <https://doi.org/10.1175/JCLI-D-17-0854.1>, 2018.
- Nihashi, S. and Ohshima, K. I.: Circumpolar Mapping of Antarctic Coastal Polynyas and Landfast Sea Ice: Relationship and Variability, *J. Climate*, 28, 3650–3670, <https://doi.org/10.1175/JCLI-D-14-00369.1>, 2015.
- Paolo, F. S., Fricker, H. A., and Padman, L.: Volume loss from Antarctic ice shelves is accelerating, *Science*, 348, 327–331, 460 <https://doi.org/10.1126/science.aaa0940>, 2015.
- Pelle, T., Morlighem, M., Nakayama, Y., and Seroussi, H.: Widespread Grounding Line Retreat of Totten Glacier, East Antarctica, Over the 21st Century, *Geophys. Res. Lett.*, 48, e2021GL093 213, <https://doi.org/10.1029/2021GL093213>, 2021.
- Pelletier, C., Fichefet, T., Goosse, H., Haubner, K., Helsen, S., Huot, P.-V., Kittel, C., Klein, F., Le clec’h, S., van Lipzig, N. P. M., Marchi, S., Massonnet, F., Mathiot, P., Moravveji, E., Moreno-Chamarro, E., Ortega, P., Pattyn, F., Souverijns, N., Van Achter, G., Vanden Broucke, S., 465 Vanhulle, A., Verfaillie, D., and Zipf, L.: PARASO, a circum-Antarctic fully-coupled ice-sheet - ocean - sea-ice - atmosphere - land model

- p involving f.ETISH1.7, NEMO3.6, LIM3.6, COSMO5.0 and CLM4.5,
- Geosci. Model Dev.*
- , 15, 553–594,
- <https://doi.org/10.5194/gmd-2021-315>
- , 2022.
- Pellichero, V., Sallée, J.-B., Chapman, C. C., and Downes, S. M.: The southern ocean meridional overturning in the sea-ice sector is driven by freshwater fluxes, *Nat. Commun.*, 9, <https://doi.org/10.1038/s41467-018-04101-2>, 2018.
- 470 Rignot, E., Jacobs, S., Mouginot, J., and Scheuchl, B.: Ice-Shelf Melting Around Antarctica, *Science*, 341, 266–270, <https://doi.org/10.1126/science.1235798>, 2013.
- Rintoul, S. R., Silvano, A., Pena-Molino, B., van Wijk, E., Rosenberg, M., Greenbaum, J. S., and Blankenship, D. D.: Ocean heat drives rapid basal melt of the Totten Ice Shelf, *Sci. Adv.*, 2, <https://doi.org/10.1126/sciadv.1601610>, 2016.
- Roberts, J. L., Warner, R. C., Young, D., Wright, A., van Ommen, T. D., Blankenship, D. D., Siegert, M., Young, N. W., Tabacco, I. E.,  
475 Forieri, A., Passerini, A., Zirizzotti, A., and Frezzotti, M.: Refined broad-scale sub-glacial morphology of Aurora Subglacial Basin, East Antarctica derived by an ice-dynamics-based interpolation scheme, *The Cryosphere*, 5, 551–560, <https://doi.org/10.5194/tc-5-551-2011>, 2011.
- Roquet, F., Williams, G., Hindell, M. A., Harcourt, R., McMahon, C., Guinet, C., Charrassin, J.-B., Reverdin, G., Boehme, L., Lovell, P., and Fedak, M.: A Southern Indian Ocean database of hydrographic profiles obtained with instrumented elephant seals, *Scientific Data*, 1,  
480 <https://doi.org/10.1038/sdata.2014.28>, 2014.
- Rousset, C., Vancoppenolle, M., Madec, G., Fichefet, T., Flavoni, S., Barthélemy, A., Benshila, R., Chanut, J., Levy, C., Masson, S., and Vivier, F.: The Louvain-La-Neuve sea ice model LIM3.6: global and regional capabilities, *Geosci. Model Dev.*, 8, 2991–3005, <https://doi.org/10.5194/gmd-8-2991-2015>, 2015.
- Stewart, A. L., Klocker, A., and Menemenlis, D.: Circum-Antarctic Shoreward Heat Transport Derived From an Eddy- and Tide-Resolving  
485 Simulation, *Geophysical Research Letters*, 45, 834–845, <https://doi.org/10.1002/2017GL075677>, 2018.
- Thompson, A. F., Stewart, A. L., Spence, P., and Heywood, K. J.: The Antarctic Slope Current in a Changing Climate, *Reviews of Geophysics*, 56, 741–770, <https://doi.org/10.1029/2018RG000624>, 2018.
- Timmermann, R. and Goeller, S.: Response to Filchner–Ronne Ice Shelf cavity warming in a coupled ocean–ice sheet model – Part 1: The ocean perspective, *Ocean Science*, 13, 765–776, <https://doi.org/10.5194/os-13-765-2017>, 2017.
- 490 Van Achter, G., Fichefet, T., Goosse, H., Pelletier, C., Sterlin, J., Huot, P.-V., Lemieux, J.-F., Fraser, A. D., Haubner, K., and Porter-Smith, R.: Modelling landfast sea ice and its influence on ocean–ice interactions in the area of the Totten Glacier, East Antarctica, *Ocean Model.*, 169, 101 920, <https://doi.org/10.1016/j.ocemod.2021.101920>, 2022.
- Vancoppenolle, M., Fichefet, T., Goosse, H., Bouillon, S., Madec, G., and Maqueda, M.: Simulating the mass balance and salinity of Arctic and Antarctic sea ice. 1. Model description and validation, *Ocean Model.*, 27, 33 – 53, <https://doi.org/10.1016/j.ocemod.2008.10.005>,  
495 2009.
- Whitworth, T., Orsi, A. H., Kim, S.-J., Nowlin Jr., W. D., and Locarnini, R. A.: Water Masses and Mixing Near the Antarctic Slope Front, pp. 1–27, American Geophysical Union (AGU), <https://doi.org/10.1029/AR075p0001>, 1985.
- WMO: WMO sea-ice nomenclature. Terminology, codes and illustrated glossary, *Tech. Rep.*, 259, 1970.
